# Supplementary material for: Differences Between VHA-Delivered and VHA-Purchased Behavioral Health Care in Service and Patient Characteristics
Source: Atypon-hosted journal article supplement (doi:10.1176/appi.ps.202100730), 2022-08-30
Supplement: appi.ps.202100730.ds001.pdf [file appi.ps.202100730.ds001.pdf]

## International Classification of Diseases, Tenth Revision (ICD-10) Codes Grouped by Behavioral Health Condition Type

| ICD10   | Description                                           | Category |
|---------|-------------------------------------------------------|----------|
| F06.4   | Anxiety disorder due to known physiological condition | ANXDIS   |
| F40.00  | Agoraphobia, unspecified                              | ANXDIS   |
| F40.01  | Agoraphobia with panic disorder                       | ANXDIS   |
| F40.02  | Agoraphobia without panic disorder                    | ANXDIS   |
| F40.10  | Social phobia, unspecified                            | ANXDIS   |
| F40.11  | Social phobia, generalized                            | ANXDIS   |
| F40.210 | Arachnophobia                                         | ANXDIS   |
| F40.218 | Other animal type phobia                              | ANXDIS   |
| F40.220 | Fear of thunderstorms                                 | ANXDIS   |
| F40.228 | Other natural environment type phobia                 | ANXDIS   |
| F40.230 | Fear of blood                                         | ANXDIS   |
| F40.231 | Fear of injections and transfusions                   | ANXDIS   |
| F40.232 | Fear of other medical care                            | ANXDIS   |
| F40.233 | Fear of injury                                        | ANXDIS   |
| F40.240 | Claustrophobia                                        | ANXDIS   |
| F40.241 | Acrophobia                                            | ANXDIS   |
| F40.242 | Fear of bridges                                       | ANXDIS   |
| F40.243 | Fear of flying                                        | ANXDIS   |
| F40.248 | Other situational type phobia                         | ANXDIS   |
| F40.290 | Androphobia                                           | ANXDIS   |
| F40.291 | Gynephobia                                            | ANXDIS   |
| F40.298 | Other specified phobia                                | ANXDIS   |
| F40.8   | Other phobic anxiety disorders                        | ANXDIS   |
| F40.9   | Phobic anxiety disorder, unspecified                  | ANXDIS   |
| F41.0   | Panic disorder [episodic paroxysmal anxiety]          | ANXDIS   |
| F41.1   | Generalized anxiety disorder                          | ANXDIS   |
| F41.3   | Other mixed anxiety disorders                         | ANXDIS   |
| F41.8   | Other specified anxiety disorders                     | ANXDIS   |
| F41.9   | Anxiety disorder, unspecified                         | ANXDIS   |
| F42.    | Obsessive-Compulsive Disorder                         | ANXDIS   |
| F42.2   | Mixed obsessional thoughts and acts                   | ANXDIS   |
| F42.3   | Hoarding disorder                                     | ANXDIS   |
| F42.4   | Excoriation (skin-picking) disorder                   | ANXDIS   |
| F42.8   | Other obsessive-compulsive disorder                   | ANXDIS   |
| F42.9   | Obsessive-compulsive disorder, unspecified            | ANXDIS   |
| F43.22  | Adjustment disorder with anxiety                      | ANXDIS   |
| F45.20  | Hypochondriacal disorder, unspecified                 | ANXDIS   |

|        |                                                                                                                              |        |
|--------|------------------------------------------------------------------------------------------------------------------------------|--------|
| F45.21 | Hypochondriasis                                                                                                              | ANXDIS |
| F45.29 | Other hypochondriacal disorders                                                                                              | ANXDIS |
| F32.0  | Major depressive disorder, single episode, mild                                                                              | MOOD_D |
| F32.1  | Major depressive disorder, single episode, moderate                                                                          | MOOD_D |
| F32.2  | Major depressive disorder, single episode, severe without psychotic features                                                 | MOOD_D |
| F32.3  | Major depressive disorder, single episode, severe with psychotic features                                                    | MOOD_D |
| F32.4  | Major depressive disorder, single episode, in partial remission                                                              | MOOD_D |
| F32.5  | Major depressive disorder, single episode, in full remission                                                                 | MOOD_D |
| F32.8  | Other Depressive Episodes                                                                                                    | MOOD_D |
| F32.81 | Premenstrual dysphoric disorder                                                                                              | MOOD_D |
| F32.89 | Other specified depressive episodes                                                                                          | MOOD_D |
| F32.9  | Major depressive disorder, single episode, unspecified                                                                       | MOOD_D |
| F33.0  | Major depressive disorder, recurrent, mild                                                                                   | MOOD_D |
| F33.1  | Major depressive disorder, recurrent, moderate                                                                               | MOOD_D |
| F33.2  | Major depressive disorder, recurrent severe without psychotic features                                                       | MOOD_D |
| F33.3  | Major depressive disorder, recurrent, severe with psychotic symptoms                                                         | MOOD_D |
| F33.40 | Major depressive disorder, recurrent, in remission, unspecified                                                              | MOOD_D |
| F33.41 | Major depressive disorder, recurrent, in partial remission                                                                   | MOOD_D |
| F33.42 | Major depressive disorder, recurrent, in full remission                                                                      | MOOD_D |
| F33.8  | Other recurrent depressive disorders                                                                                         | MOOD_D |
| F33.9  | Major depressive disorder, recurrent, unspecified                                                                            | MOOD_D |
| F34.0  | Cyclothymic disorder                                                                                                         | MOOD_D |
| F34.1  | Dysthymic disorder                                                                                                           | MOOD_D |
| F34.8  | Other Persistent Mood [Affective] Disorders                                                                                  | MOOD_D |
| F34.81 | Disruptive mood dysregulation disorder                                                                                       | MOOD_D |
| F34.89 | Other specified persistent mood disorders                                                                                    | MOOD_D |
| F34.9  | Persistent mood [affective] disorder, unspecified                                                                            | MOOD_D |
| F39.   | Unspecified mood [affective] disorder                                                                                        | MOOD_D |
| F43.21 | Adjustment disorder with depressed mood                                                                                      | MOOD_D |
| F43.23 | Adjustment disorder with mixed anxiety and depressed mood                                                                    | MOOD_D |
| F53.0  | Postpartum depression                                                                                                        | MOOD_D |
| F06.8  | Catatonic disorder, personality change, and other mental disorders due to a known physiologic condition - *ADDED 2020.05.27* | OTH_MH |
| F09    | Catatonic disorder, personality change, and other mental disorders due to a known physiologic condition - *ADDED 2020.05.27* | OTH_MH |
| F43.0  | Acute stress reaction                                                                                                        | OTH_MH |
| F43.20 | Adjustment disorder, unspecified                                                                                             | OTH_MH |
| F43.24 | Adjustment disorder with disturbance of conduct                                                                              | OTH_MH |
| F43.25 | Adjustment disorder with mixed disturbance of emotions and conduct                                                           | OTH_MH |
| F43.29 | Adjustment disorder with other symptoms                                                                                      | OTH_MH |
| F43.8  | Other reactions to severe stress                                                                                             | OTH_MH |

|        |                                                                                                  |        |
|--------|--------------------------------------------------------------------------------------------------|--------|
| F43.9  | Reaction to severe stress, unspecified                                                           | OTH_MH |
| F44.0  | Dissociative amnesia                                                                             | OTH_MH |
| F44.1  | Dissociative fugue                                                                               | OTH_MH |
| F44.2  | Dissociative stupor                                                                              | OTH_MH |
| F44.4  | Conversion disorder with motor symptom or deficit                                                | OTH_MH |
| F44.5  | Conversion disorder with seizures or convulsions                                                 | OTH_MH |
| F44.6  | Conversion disorder with sensory symptom or deficit                                              | OTH_MH |
| F44.7  | Conversion disorder with mixed symptom presentation                                              | OTH_MH |
| F44.81 | Dissociative identity disorder                                                                   | OTH_MH |
| F44.89 | Other dissociative and conversion disorders                                                      | OTH_MH |
| F44.9  | Dissociative and conversion disorder, unspecified                                                | OTH_MH |
| F45.0  | Somatization disorder                                                                            | OTH_MH |
| F45.1  | Undifferentiated somatoform disorder                                                             | OTH_MH |
| F45.22 | Body dysmorphic disorder                                                                         | OTH_MH |
| F45.8  | Other somatoform disorders                                                                       | OTH_MH |
| F45.9  | Somatoform disorder, unspecified                                                                 | OTH_MH |
| F48.1  | Depersonalization-derealization syndrome                                                         | OTH_MH |
| F48.8  | Non-psychotic mental disorders - *ADDED 2020.05.27*                                              | OTH_MH |
| F48.9  | Non-psychotic mental disorders - *ADDED 2020.05.27*                                              | OTH_MH |
| F50.00 | Anorexia nervosa, unspecified                                                                    | OTH_MH |
| F50.01 | Anorexia nervosa, restricting type                                                               | OTH_MH |
| F50.02 | Anorexia nervosa, binge eating/purging type                                                      | OTH_MH |
| F50.2  | Bulimia nervosa                                                                                  | OTH_MH |
| F50.8  | Other Eating Disorders                                                                           | OTH_MH |
| F50.81 | Binge eating disorder                                                                            | OTH_MH |
| F50.82 | Avoidant/restrictive food intake disorder                                                        | OTH_MH |
| F50.89 | Other specified eating disorder                                                                  | OTH_MH |
| F50.9  | Eating disorder, unspecified                                                                     | OTH_MH |
| F63.0  | Pathological gambling                                                                            | OTH_MH |
| F63.1  | Pyromania                                                                                        | OTH_MH |
| F63.2  | Kleptomania                                                                                      | OTH_MH |
| F63.3  | Trichotillomania                                                                                 | OTH_MH |
| F63.81 | Intermittent explosive disorder                                                                  | OTH_MH |
| F63.89 | Other impulse disorders                                                                          | OTH_MH |
| F63.9  | Impulse disorder, unspecified                                                                    | OTH_MH |
| F68.10 | Factitious disorder imposed on self, unspecified                                                 | OTH_MH |
| F68.11 | Factitious disorder imposed on self, with predominantly psychological signs and symptoms         | OTH_MH |
| F68.12 | Factitious disorder imposed on self, with predominantly physical signs and symptoms              | OTH_MH |
| F68.13 | Factitious disorder imposed on self, with combined psychological and physical signs and symptoms | OTH_MH |

|        |                                                                                                                              |        |
|--------|------------------------------------------------------------------------------------------------------------------------------|--------|
| F90.0  | Attention-deficit hyperactivity disorder, predominantly inattentive type                                                     | OTH_MH |
| F90.1  | Attention-deficit hyperactivity disorder, predominantly hyperactive type                                                     | OTH_MH |
| F90.2  | Attention-deficit hyperactivity disorder, combined type                                                                      | OTH_MH |
| F90.8  | Attention-deficit hyperactivity disorder, other type                                                                         | OTH_MH |
| F90.9  | Attention-deficit hyperactivity disorder, unspecified type                                                                   | OTH_MH |
| F91.0  | Conduct disorder confined to family context                                                                                  | OTH_MH |
| F91.1  | Conduct disorder, childhood-onset type                                                                                       | OTH_MH |
| F91.2  | Conduct disorder, adolescent-onset type                                                                                      | OTH_MH |
| F91.3  | Oppositional defiant disorder                                                                                                | OTH_MH |
| F91.8  | Other conduct disorders                                                                                                      | OTH_MH |
| F91.9  | Conduct disorder, unspecified                                                                                                | OTH_MH |
| R45.7  | State of emotional shock and stress, unspecified                                                                             | OTH_MH |
| F07.0  | Catatonic disorder, personality change, and other mental disorders due to a known physiologic condition - *ADDED 2020.05.27* | PERSON |
| F07.89 | Catatonic disorder, personality change, and other mental disorders due to a known physiologic condition - *ADDED 2020.05.27* | PERSON |
| F07.9  | Catatonic disorder, personality change, and other mental disorders due to a known physiologic condition - *ADDED 2020.05.27* | PERSON |
| F60.0  | Paranoid personality disorder                                                                                                | PERSON |
| F60.1  | Schizoid personality disorder                                                                                                | PERSON |
| F60.2  | Antisocial personality disorder                                                                                              | PERSON |
| F60.3  | Borderline personality disorder                                                                                              | PERSON |
| F60.4  | Histrionic personality disorder                                                                                              | PERSON |
| F60.5  | Obsessive-compulsive personality disorder                                                                                    | PERSON |
| F60.6  | Avoidant personality disorder                                                                                                | PERSON |
| F60.7  | Dependent personality disorder                                                                                               | PERSON |
| F60.81 | Narcissistic personality disorder                                                                                            | PERSON |
| F60.89 | Other specific personality disorders                                                                                         | PERSON |
| F60.9  | Personality disorder, unspecified                                                                                            | PERSON |
| F68.8  | Other specified disorders of adult personality and behavior                                                                  | PERSON |
| F69.   | Unspecified disorder of adult personality and behavior                                                                       | PERSON |
| F43.10 | Post-traumatic stress disorder, unspecified                                                                                  | PTSD   |
| F43.11 | Post-traumatic stress disorder, acute                                                                                        | PTSD   |
| F43.12 | Post-traumatic stress disorder, chronic                                                                                      | PTSD   |
| F06.0  | Psychotic disorder with hallucinations due to known physiological condition                                                  | SMI    |
| F06.1  | Catatonic disorder, personality change, and other mental disorders due to a known physiologic condition - *ADDED 2020.05.27* | SMI    |
| F06.2  | Psychotic disorder with delusions due to known physiological condition                                                       | SMI    |
| F06.30 | Mood disorder due to known physiological condition, unspecified                                                              | SMI    |
| F06.31 | Mood disorder due to known physiological condition with depressive features                                                  | SMI    |
| F06.32 | Mood disorder due to known physiological condition with major depressive-like episode                                        | SMI    |
| F06.33 | Mood disorder due to known physiological condition with manic features                                                       | SMI    |

|         |                                                                                                                        |     |
|---------|------------------------------------------------------------------------------------------------------------------------|-----|
| F06.34  | Mood disorder due to known physiological condition with mixed features                                                 | SMI |
| F10.14  | Alcohol abuse with alcohol-induced mood disorder                                                                       | SMI |
| F10.150 | Alcohol abuse with alcohol-induced psychotic disorder with delusions                                                   | SMI |
| F10.151 | Alcohol abuse with alcohol-induced psychotic disorder with hallucinations                                              | SMI |
| F10.159 | Alcohol abuse with alcohol-induced psychotic disorder, unspecified                                                     | SMI |
| F10.24  | Alcohol dependence with alcohol-induced mood disorder                                                                  | SMI |
| F10.250 | Alcohol dependence with alcohol-induced psychotic disorder with delusions                                              | SMI |
| F10.251 | Alcohol dependence with alcohol-induced psychotic disorder with hallucinations                                         | SMI |
| F10.259 | Alcohol dependence with alcohol-induced psychotic disorder, unspecified                                                | SMI |
| F10.94  | Alcohol use, unspecified with alcohol-induced mood disorder                                                            | SMI |
| F10.950 | Alcohol use, unspecified with alcohol-induced psychotic disorder with delusions                                        | SMI |
| F10.951 | Alcohol use, unspecified with alcohol-induced psychotic disorder with hallucinations                                   | SMI |
| F10.959 | Alcohol use, unspecified with alcohol-induced psychotic disorder, unspecified                                          | SMI |
| F11.14  | Opioid abuse with opioid-induced mood disorder                                                                         | SMI |
| F11.150 | Opioid abuse with opioid-induced psychotic disorder with delusions                                                     | SMI |
| F11.151 | Opioid abuse with opioid-induced psychotic disorder with hallucinations                                                | SMI |
| F11.159 | Opioid abuse with opioid-induced psychotic disorder, unspecified                                                       | SMI |
| F11.24  | Opioid dependence with opioid-induced mood disorder                                                                    | SMI |
| F11.250 | Opioid dependence with opioid-induced psychotic disorder with delusions                                                | SMI |
| F11.251 | Opioid dependence with opioid-induced psychotic disorder with hallucinations                                           | SMI |
| F11.259 | Opioid dependence with opioid-induced psychotic disorder, unspecified                                                  | SMI |
| F11.94  | Opioid use, unspecified with opioid-induced mood disorder                                                              | SMI |
| F11.950 | Opioid use, unspecified with opioid-induced psychotic disorder with delusions                                          | SMI |
| F11.951 | Opioid use, unspecified with opioid-induced psychotic disorder with hallucinations                                     | SMI |
| F11.959 | Opioid use, unspecified with opioid-induced psychotic disorder, unspecified                                            | SMI |
| F12.150 | Cannabis abuse with psychotic disorder with delusions                                                                  | SMI |
| F12.151 | Cannabis abuse with psychotic disorder with hallucinations                                                             | SMI |
| F12.159 | Cannabis abuse with psychotic disorder, unspecified                                                                    | SMI |
| F12.250 | Cannabis dependence with psychotic disorder with delusions                                                             | SMI |
| F12.251 | Cannabis dependence with psychotic disorder with hallucinations                                                        | SMI |
| F12.259 | Cannabis dependence with psychotic disorder, unspecified                                                               | SMI |
| F12.950 | Cannabis use, unspecified with psychotic disorder with delusions                                                       | SMI |
| F12.951 | Cannabis use, unspecified with psychotic disorder with hallucinations                                                  | SMI |
| F12.959 | Cannabis use, unspecified with psychotic disorder, unspecified                                                         | SMI |
| F13.14  | Sedative, hypnotic or anxiolytic abuse with sedative, hypnotic or anxiolytic-induced mood disorder                     | SMI |
| F13.150 | Sedative, hypnotic or anxiolytic abuse with sedative, hypnotic or anxiolytic-induced psychotic disorder with delusions | SMI |

|         |                                                                                                                                        |     |
|---------|----------------------------------------------------------------------------------------------------------------------------------------|-----|
| F13.151 | Sedative, hypnotic or anxiolytic abuse with sedative, hypnotic or anxiolytic-induced psychotic disorder with hallucinations            | SMI |
| F13.159 | Sedative, hypnotic or anxiolytic abuse with sedative, hypnotic or anxiolytic-induced psychotic disorder, unspecified                   | SMI |
| F13.24  | Sedative, hypnotic or anxiolytic dependence with sedative, hypnotic or anxiolytic-induced mood disorder                                | SMI |
| F13.250 | Sedative, hypnotic or anxiolytic dependence with sedative, hypnotic or anxiolytic-induced psychotic disorder with delusions            | SMI |
| F13.251 | Sedative, hypnotic or anxiolytic dependence with sedative, hypnotic or anxiolytic-induced psychotic disorder with hallucinations       | SMI |
| F13.259 | Sedative, hypnotic or anxiolytic dependence with sedative, hypnotic or anxiolytic-induced psychotic disorder, unspecified              | SMI |
| F13.94  | Sedative, hypnotic or anxiolytic use, unspecified with sedative, hypnotic or anxiolytic-induced mood disorder                          | SMI |
| F13.950 | Sedative, hypnotic or anxiolytic use, unspecified with sedative, hypnotic or anxiolytic-induced psychotic disorder with delusions      | SMI |
| F13.951 | Sedative, hypnotic or anxiolytic use, unspecified with sedative, hypnotic or anxiolytic-induced psychotic disorder with hallucinations | SMI |
| F13.959 | Sedative, hypnotic or anxiolytic use, unspecified with sedative, hypnotic or anxiolytic-induced psychotic disorder, unspecified        | SMI |
| F14.14  | Cocaine abuse with cocaine-induced mood disorder                                                                                       | SMI |
| F14.150 | Cocaine abuse with cocaine-induced psychotic disorder with delusions                                                                   | SMI |
| F14.151 | Cocaine abuse with cocaine-induced psychotic disorder with hallucinations                                                              | SMI |
| F14.159 | Cocaine abuse with cocaine-induced psychotic disorder, unspecified                                                                     | SMI |
| F14.24  | Cocaine dependence with cocaine-induced mood disorder                                                                                  | SMI |
| F14.250 | Cocaine dependence with cocaine-induced psychotic disorder with delusions                                                              | SMI |
| F14.251 | Cocaine dependence with cocaine-induced psychotic disorder with hallucinations                                                         | SMI |
| F14.259 | Cocaine dependence with cocaine-induced psychotic disorder, unspecified                                                                | SMI |
| F14.94  | Cocaine use, unspecified with cocaine-induced mood disorder                                                                            | SMI |
| F14.950 | Cocaine use, unspecified with cocaine-induced psychotic disorder with delusions                                                        | SMI |
| F14.951 | Cocaine use, unspecified with cocaine-induced psychotic disorder with hallucinations                                                   | SMI |
| F14.959 | Cocaine use, unspecified with cocaine-induced psychotic disorder, unspecified                                                          | SMI |
| F15.14  | Other stimulant abuse with stimulant-induced mood disorder                                                                             | SMI |
| F15.150 | Other stimulant abuse with stimulant-induced psychotic disorder with delusions                                                         | SMI |
| F15.151 | Other stimulant abuse with stimulant-induced psychotic disorder with hallucinations                                                    | SMI |
| F15.159 | Other stimulant abuse with stimulant-induced psychotic disorder, unspecified                                                           | SMI |
| F15.24  | Other stimulant dependence with stimulant-induced mood disorder                                                                        | SMI |
| F15.250 | Other stimulant dependence with stimulant-induced psychotic disorder with delusions                                                    | SMI |
| F15.251 | Other stimulant dependence with stimulant-induced psychotic disorder with hallucinations                                               | SMI |
| F15.259 | Other stimulant dependence with stimulant-induced psychotic disorder, unspecified                                                      | SMI |
| F15.94  | Other stimulant use, unspecified with stimulant-induced mood disorder                                                                  | SMI |

|         |                                                                                                               |     |
|---------|---------------------------------------------------------------------------------------------------------------|-----|
| F15.950 | Other stimulant use, unspecified with stimulant-induced psychotic disorder with delusions                     | SMI |
| F15.951 | Other stimulant use, unspecified with stimulant-induced psychotic disorder with hallucinations                | SMI |
| F15.959 | Other stimulant use, unspecified with stimulant-induced psychotic disorder, unspecified                       | SMI |
| F16.14  | Hallucinogen abuse with hallucinogen-induced mood disorder                                                    | SMI |
| F16.150 | Hallucinogen abuse with hallucinogen-induced psychotic disorder with delusions                                | SMI |
| F16.151 | Hallucinogen abuse with hallucinogen-induced psychotic disorder with hallucinations                           | SMI |
| F16.159 | Hallucinogen abuse with hallucinogen-induced psychotic disorder, unspecified                                  | SMI |
| F16.24  | Hallucinogen dependence with hallucinogen-induced mood disorder                                               | SMI |
| F16.250 | Hallucinogen dependence with hallucinogen-induced psychotic disorder with delusions                           | SMI |
| F16.251 | Hallucinogen dependence with hallucinogen-induced psychotic disorder with hallucinations                      | SMI |
| F16.259 | Hallucinogen dependence with hallucinogen-induced psychotic disorder, unspecified                             | SMI |
| F16.94  | Hallucinogen use, unspecified with hallucinogen-induced mood disorder                                         | SMI |
| F16.950 | Hallucinogen use, unspecified with hallucinogen-induced psychotic disorder with delusions                     | SMI |
| F16.951 | Hallucinogen use, unspecified with hallucinogen-induced psychotic disorder with hallucinations                | SMI |
| F16.959 | Hallucinogen use, unspecified with hallucinogen-induced psychotic disorder, unspecified                       | SMI |
| F18.14  | Inhalant abuse with inhalant-induced mood disorder                                                            | SMI |
| F18.150 | Inhalant abuse with inhalant-induced psychotic disorder with delusions                                        | SMI |
| F18.151 | Inhalant abuse with inhalant-induced psychotic disorder with hallucinations                                   | SMI |
| F18.159 | Inhalant abuse with inhalant-induced psychotic disorder, unspecified                                          | SMI |
| F18.24  | Inhalant dependence with inhalant-induced mood disorder                                                       | SMI |
| F18.250 | Inhalant dependence with inhalant-induced psychotic disorder with delusions                                   | SMI |
| F18.251 | Inhalant dependence with inhalant-induced psychotic disorder with hallucinations                              | SMI |
| F18.259 | Inhalant dependence with inhalant-induced psychotic disorder, unspecified                                     | SMI |
| F18.94  | Inhalant use, unspecified with inhalant-induced mood disorder                                                 | SMI |
| F18.950 | Inhalant use, unspecified with inhalant-induced psychotic disorder with delusions                             | SMI |
| F18.951 | Inhalant use, unspecified with inhalant-induced psychotic disorder with hallucinations                        | SMI |
| F18.959 | Inhalant use, unspecified with inhalant-induced psychotic disorder, unspecified                               | SMI |
| F19.14  | Other psychoactive substance abuse with psychoactive substance-induced mood disorder                          | SMI |
| F19.150 | Other psychoactive substance abuse with psychoactive substance-induced psychotic disorder with delusions      | SMI |
| F19.151 | Other psychoactive substance abuse with psychoactive substance-induced psychotic disorder with hallucinations | SMI |
| F19.159 | Other psychoactive substance abuse with psychoactive substance-induced psychotic disorder, unspecified        | SMI |

|         |                                                                                                                          |     |
|---------|--------------------------------------------------------------------------------------------------------------------------|-----|
| F19.24  | Other psychoactive substance dependence with psychoactive substance-induced mood disorder                                | SMI |
| F19.250 | Other psychoactive substance dependence with psychoactive substance-induced psychotic disorder with delusions            | SMI |
| F19.251 | Other psychoactive substance dependence with psychoactive substance-induced psychotic disorder with hallucinations       | SMI |
| F19.259 | Other psychoactive substance dependence with psychoactive substance-induced psychotic disorder, unspecified              | SMI |
| F19.94  | Other psychoactive substance use, unspecified with psychoactive substance-induced mood disorder                          | SMI |
| F19.950 | Other psychoactive substance use, unspecified with psychoactive substance-induced psychotic disorder with delusions      | SMI |
| F19.951 | Other psychoactive substance use, unspecified with psychoactive substance-induced psychotic disorder with hallucinations | SMI |
| F19.959 | Other psychoactive substance use, unspecified with psychoactive substance-induced psychotic disorder, unspecified        | SMI |
| F20.0   | Paranoid schizophrenia                                                                                                   | SMI |
| F20.1   | Disorganized schizophrenia                                                                                               | SMI |
| F20.2   | Catatonic schizophrenia                                                                                                  | SMI |
| F20.3   | Undifferentiated schizophrenia                                                                                           | SMI |
| F20.5   | Residual schizophrenia                                                                                                   | SMI |
| F20.81  | Schizophreniform disorder                                                                                                | SMI |
| F20.89  | Other schizophrenia                                                                                                      | SMI |
| F20.9   | Schizophrenia, unspecified                                                                                               | SMI |
| F21.    | Schizotypal disorder                                                                                                     | SMI |
| F22.    | Delusional disorders                                                                                                     | SMI |
| F23.    | Brief psychotic disorder                                                                                                 | SMI |
| F24.    | Shared psychotic disorder                                                                                                | SMI |
| F25.0   | Schizoaffective disorder, bipolar type                                                                                   | SMI |
| F25.1   | Schizoaffective disorder, depressive type                                                                                | SMI |
| F25.8   | Other schizoaffective disorders                                                                                          | SMI |
| F25.9   | Schizoaffective disorder, unspecified                                                                                    | SMI |
| F28.    | Other psychotic disorder not due to a substance or known physiological condition                                         | SMI |
| F29.    | Unspecified psychosis not due to a substance or known physiological condition                                            | SMI |
| F30.10  | Manic episode without psychotic symptoms, unspecified                                                                    | SMI |
| F30.11  | Manic episode without psychotic symptoms, mild                                                                           | SMI |
| F30.12  | Manic episode without psychotic symptoms, moderate                                                                       | SMI |
| F30.13  | Manic episode, severe, without psychotic symptoms                                                                        | SMI |
| F30.2   | Manic episode, severe with psychotic symptoms                                                                            | SMI |
| F30.3   | Manic episode in partial remission                                                                                       | SMI |
| F30.4   | Manic episode in full remission                                                                                          | SMI |
| F30.8   | Other manic episodes                                                                                                     | SMI |
| F30.9   | Manic episode, unspecified                                                                                               | SMI |
| F31.0   | Bipolar disorder, current episode hypomanic                                                                              | SMI |



|         |                                                                                     |         |
|---------|-------------------------------------------------------------------------------------|---------|
| F31.10  | Bipolar disorder, current episode manic without psychotic features, unspecified     | SMI     |
| F31.11  | Bipolar disorder, current episode manic without psychotic features, mild            | SMI     |
| F31.12  | Bipolar disorder, current episode manic without psychotic features, moderate        | SMI     |
| F31.13  | Bipolar disorder, current episode manic without psychotic features, severe          | SMI     |
| F31.2   | Bipolar disorder, current episode manic severe with psychotic features              | SMI     |
| F31.30  | Bipolar disorder, current episode depressed, mild or moderate severity, unspecified | SMI     |
| F31.31  | Bipolar disorder, current episode depressed, mild                                   | SMI     |
| F31.32  | Bipolar disorder, current episode depressed, moderate                               | SMI     |
| F31.4   | Bipolar disorder, current episode depressed, severe, without psychotic features     | SMI     |
| F31.5   | Bipolar disorder, current episode depressed, severe, with psychotic features        | SMI     |
| F31.60  | Bipolar disorder, current episode mixed, unspecified                                | SMI     |
| F31.61  | Bipolar disorder, current episode mixed, mild                                       | SMI     |
| F31.62  | Bipolar disorder, current episode mixed, moderate                                   | SMI     |
| F31.63  | Bipolar disorder, current episode mixed, severe, without psychotic features         | SMI     |
| F31.64  | Bipolar disorder, current episode mixed, severe, with psychotic features            | SMI     |
| F31.70  | Bipolar disorder, currently in remission, most recent episode unspecified           | SMI     |
| F31.71  | Bipolar disorder, in partial remission, most recent episode hypomanic               | SMI     |
| F31.72  | Bipolar disorder, in full remission, most recent episode hypomanic                  | SMI     |
| F31.73  | Bipolar disorder, in partial remission, most recent episode manic                   | SMI     |
| F31.74  | Bipolar disorder, in full remission, most recent episode manic                      | SMI     |
| F31.75  | Bipolar disorder, in partial remission, most recent episode depressed               | SMI     |
| F31.76  | Bipolar disorder, in full remission, most recent episode depressed                  | SMI     |
| F31.77  | Bipolar disorder, in partial remission, most recent episode mixed                   | SMI     |
| F31.78  | Bipolar disorder, in full remission, most recent episode mixed                      | SMI     |
| F31.81  | Bipolar II disorder                                                                 | SMI     |
| F31.89  | Other bipolar disorder                                                              | SMI     |
| F31.9   | Bipolar disorder, unspecified                                                       | SMI     |
| F10.10  | Alcohol abuse, uncomplicated                                                        | SUD_ALL |
| F10.11  | Alcohol abuse, in remission                                                         | SUD_ALL |
| F10.120 | Alcohol abuse with intoxication, uncomplicated                                      | SUD_ALL |
| F10.121 | Alcohol abuse with intoxication delirium                                            | SUD_ALL |
| F10.129 | Alcohol abuse with intoxication, unspecified                                        | SUD_ALL |
| F10.180 | Alcohol abuse with alcohol-induced anxiety disorder                                 | SUD_ALL |
| F10.181 | Alcohol abuse with alcohol-induced sexual dysfunction                               | SUD_ALL |
| F10.182 | Alcohol abuse with alcohol-induced sleep disorder                                   | SUD_ALL |
| F10.188 | Alcohol abuse with other alcohol-induced disorder                                   | SUD_ALL |
| F10.19  | Alcohol abuse with unspecified alcohol-induced disorder                             | SUD_ALL |
| F10.20  | Alcohol dependence, uncomplicated                                                   | SUD_ALL |
| F10.21  | Alcohol dependence, in remission                                                    | SUD_ALL |

|         |                                                                            |         |
|---------|----------------------------------------------------------------------------|---------|
| F10.220 | Alcohol dependence with intoxication, uncomplicated                        | SUD_ALL |
| F10.221 | Alcohol dependence with intoxication delirium                              | SUD_ALL |
| F10.229 | Alcohol dependence with intoxication, unspecified                          | SUD_ALL |
| F10.230 | Alcohol dependence with withdrawal, uncomplicated                          | SUD_ALL |
| F10.231 | Alcohol dependence with withdrawal delirium                                | SUD_ALL |
| F10.232 | Alcohol dependence with withdrawal with perceptual disturbance             | SUD_ALL |
| F10.239 | Alcohol dependence with withdrawal, unspecified                            | SUD_ALL |
| F10.26  | Alcohol dependence with alcohol-induced persisting amnestic disorder       | SUD_ALL |
| F10.27  | Alcohol dependence with alcohol-induced persisting dementia                | SUD_ALL |
| F10.280 | Alcohol dependence with alcohol-induced anxiety disorder                   | SUD_ALL |
| F10.281 | Alcohol dependence with alcohol-induced sexual dysfunction                 | SUD_ALL |
| F10.282 | Alcohol dependence with alcohol-induced sleep disorder                     | SUD_ALL |
| F10.288 | Alcohol dependence with other alcohol-induced disorder                     | SUD_ALL |
| F10.29  | Alcohol dependence with unspecified alcohol-induced disorder               | SUD_ALL |
| F10.920 | Alcohol use, unspecified with intoxication, uncomplicated                  | SUD_ALL |
| F10.921 | Alcohol use, unspecified with intoxication delirium                        | SUD_ALL |
| F10.929 | Alcohol use, unspecified with intoxication, unspecified                    | SUD_ALL |
| F10.96  | Alcohol use, unspecified with alcohol-induced persisting amnestic disorder | SUD_ALL |
| F10.97  | Alcohol use, unspecified with alcohol-induced persisting dementia          | SUD_ALL |
| F10.980 | Alcohol use, unspecified with alcohol-induced anxiety disorder             | SUD_ALL |
| F10.981 | Alcohol use, unspecified with alcohol-induced sexual dysfunction           | SUD_ALL |
| F10.982 | Alcohol use, unspecified with alcohol-induced sleep disorder               | SUD_ALL |
| F10.988 | Alcohol use, unspecified with other alcohol-induced disorder               | SUD_ALL |
| F10.99  | Alcohol use, unspecified with unspecified alcohol-induced disorder         | SUD_ALL |
| F11.10  | Opioid abuse, uncomplicated                                                | SUD_ALL |
| F11.11  | Opioid abuse, in remission                                                 | SUD_ALL |
| F11.120 | Opioid abuse with intoxication, uncomplicated                              | SUD_ALL |
| F11.121 | Opioid abuse with intoxication delirium                                    | SUD_ALL |
| F11.122 | Opioid abuse with intoxication with perceptual disturbance                 | SUD_ALL |
| F11.129 | Opioid abuse with intoxication, unspecified                                | SUD_ALL |
| F11.181 | Opioid abuse with opioid-induced sexual dysfunction                        | SUD_ALL |
| F11.182 | Opioid abuse with opioid-induced sleep disorder                            | SUD_ALL |
| F11.188 | Opioid abuse with other opioid-induced disorder                            | SUD_ALL |
| F11.19  | Opioid abuse with unspecified opioid-induced disorder                      | SUD_ALL |
| F11.20  | Opioid dependence, uncomplicated                                           | SUD_ALL |
| F11.21  | Opioid dependence, in remission                                            | SUD_ALL |
| F11.220 | Opioid dependence with intoxication, uncomplicated                         | SUD_ALL |
| F11.221 | Opioid dependence with intoxication delirium                               | SUD_ALL |
| F11.222 | Opioid dependence with intoxication with perceptual disturbance            | SUD_ALL |
| F11.229 | Opioid dependence with intoxication, unspecified                           | SUD_ALL |
| F11.23  | Opioid dependence with withdrawal                                          | SUD_ALL |

|         |                                                                         |         |
|---------|-------------------------------------------------------------------------|---------|
| F11.281 | Opioid dependence with opioid-induced sexual dysfunction                | SUD_ALL |
| F11.282 | Opioid dependence with opioid-induced sleep disorder                    | SUD_ALL |
| F11.288 | Opioid dependence with other opioid-induced disorder                    | SUD_ALL |
| F11.29  | Opioid dependence with unspecified opioid-induced disorder              | SUD_ALL |
| F11.90  | Opioid use, unspecified, uncomplicated                                  | SUD_ALL |
| F11.920 | Opioid use, unspecified with intoxication, uncomplicated                | SUD_ALL |
| F11.921 | Opioid use, unspecified with intoxication delirium                      | SUD_ALL |
| F11.922 | Opioid use, unspecified with intoxication with perceptual disturbance   | SUD_ALL |
| F11.929 | Opioid use, unspecified with intoxication, unspecified                  | SUD_ALL |
| F11.93  | Opioid use, unspecified with withdrawal                                 | SUD_ALL |
| F11.981 | Opioid use, unspecified with opioid-induced sexual dysfunction          | SUD_ALL |
| F11.982 | Opioid use, unspecified with opioid-induced sleep disorder              | SUD_ALL |
| F11.988 | Opioid use, unspecified with other opioid-induced disorder              | SUD_ALL |
| F11.99  | Opioid use, unspecified with unspecified opioid-induced disorder        | SUD_ALL |
| F12.10  | Cannabis abuse, uncomplicated                                           | SUD_ALL |
| F12.11  | Cannabis abuse, in remission                                            | SUD_ALL |
| F12.120 | Cannabis abuse with intoxication, uncomplicated                         | SUD_ALL |
| F12.121 | Cannabis abuse with intoxication delirium                               | SUD_ALL |
| F12.122 | Cannabis abuse with intoxication with perceptual disturbance            | SUD_ALL |
| F12.129 | Cannabis abuse with intoxication, unspecified                           | SUD_ALL |
| F12.180 | Cannabis abuse with cannabis-induced anxiety disorder                   | SUD_ALL |
| F12.188 | Cannabis abuse with other cannabis-induced disorder                     | SUD_ALL |
| F12.19  | Cannabis abuse with unspecified cannabis-induced disorder               | SUD_ALL |
| F12.20  | Cannabis dependence, uncomplicated                                      | SUD_ALL |
| F12.21  | Cannabis dependence, in remission                                       | SUD_ALL |
| F12.220 | Cannabis dependence with intoxication, uncomplicated                    | SUD_ALL |
| F12.221 | Cannabis dependence with intoxication delirium                          | SUD_ALL |
| F12.222 | Cannabis dependence with intoxication with perceptual disturbance       | SUD_ALL |
| F12.229 | Cannabis dependence with intoxication, unspecified                      | SUD_ALL |
| F12.23  | Cannabis dependence with withdrawal                                     | SUD_ALL |
| F12.280 | Cannabis dependence with cannabis-induced anxiety disorder              | SUD_ALL |
| F12.288 | Cannabis dependence with other cannabis-induced disorder                | SUD_ALL |
| F12.29  | Cannabis dependence with unspecified cannabis-induced disorder          | SUD_ALL |
| F12.90  | Cannabis use, unspecified, uncomplicated                                | SUD_ALL |
| F12.920 | Cannabis use, unspecified with intoxication, uncomplicated              | SUD_ALL |
| F12.921 | Cannabis use, unspecified with intoxication delirium                    | SUD_ALL |
| F12.922 | Cannabis use, unspecified with intoxication with perceptual disturbance | SUD_ALL |
| F12.929 | Cannabis use, unspecified with intoxication, unspecified                | SUD_ALL |
| F12.93  | Cannabis use, unspecified with withdrawal                               | SUD_ALL |
| F12.980 | Cannabis use, unspecified with anxiety disorder                         | SUD_ALL |
| F12.988 | Cannabis use, unspecified with other cannabis-induced disorder          | SUD_ALL |

|         |                                                                                                                       |         |
|---------|-----------------------------------------------------------------------------------------------------------------------|---------|
| F12.99  | Cannabis use, unspecified with unspecified cannabis-induced disorder                                                  | SUD_ALL |
| F13.10  | Sedative, hypnotic or anxiolytic abuse, uncomplicated                                                                 | SUD_ALL |
| F13.11  | Sedative, hypnotic or anxiolytic abuse, in remission                                                                  | SUD_ALL |
| F13.120 | Sedative, hypnotic or anxiolytic abuse with intoxication, uncomplicated                                               | SUD_ALL |
| F13.121 | Sedative, hypnotic or anxiolytic abuse with intoxication delirium                                                     | SUD_ALL |
| F13.129 | Sedative, hypnotic or anxiolytic abuse with intoxication, unspecified                                                 | SUD_ALL |
| F13.180 | Sedative, hypnotic or anxiolytic abuse with sedative, hypnotic or anxiolytic-induced anxiety disorder                 | SUD_ALL |
| F13.181 | Sedative, hypnotic or anxiolytic abuse with sedative, hypnotic or anxiolytic-induced sexual dysfunction               | SUD_ALL |
| F13.182 | Sedative, hypnotic or anxiolytic abuse with sedative, hypnotic or anxiolytic-induced sleep disorder                   | SUD_ALL |
| F13.188 | Sedative, hypnotic or anxiolytic abuse with other sedative, hypnotic or anxiolytic-induced disorder                   | SUD_ALL |
| F13.19  | Sedative, hypnotic or anxiolytic abuse with unspecified sedative, hypnotic or anxiolytic-induced disorder             | SUD_ALL |
| F13.20  | Sedative, hypnotic or anxiolytic dependence, uncomplicated                                                            | SUD_ALL |
| F13.21  | Sedative, hypnotic or anxiolytic dependence, in remission                                                             | SUD_ALL |
| F13.220 | Sedative, hypnotic or anxiolytic dependence with intoxication, uncomplicated                                          | SUD_ALL |
| F13.221 | Sedative, hypnotic or anxiolytic dependence with intoxication delirium                                                | SUD_ALL |
| F13.229 | Sedative, hypnotic or anxiolytic dependence with intoxication, unspecified                                            | SUD_ALL |
| F13.230 | Sedative, hypnotic or anxiolytic dependence with withdrawal, uncomplicated                                            | SUD_ALL |
| F13.231 | Sedative, hypnotic or anxiolytic dependence with withdrawal delirium                                                  | SUD_ALL |
| F13.232 | Sedative, hypnotic or anxiolytic dependence with withdrawal with perceptual disturbance                               | SUD_ALL |
| F13.239 | Sedative, hypnotic or anxiolytic dependence with withdrawal, unspecified                                              | SUD_ALL |
| F13.26  | Sedative, hypnotic or anxiolytic dependence with sedative, hypnotic or anxiolytic-induced persisting amnesic disorder | SUD_ALL |
| F13.27  | Sedative, hypnotic or anxiolytic dependence with sedative, hypnotic or anxiolytic-induced persisting dementia         | SUD_ALL |
| F13.280 | Sedative, hypnotic or anxiolytic dependence with sedative, hypnotic or anxiolytic-induced anxiety disorder            | SUD_ALL |
| F13.281 | Sedative, hypnotic or anxiolytic dependence with sedative, hypnotic or anxiolytic-induced sexual dysfunction          | SUD_ALL |
| F13.282 | Sedative, hypnotic or anxiolytic dependence with sedative, hypnotic or anxiolytic-induced sleep disorder              | SUD_ALL |
| F13.288 | Sedative, hypnotic or anxiolytic dependence with other sedative, hypnotic or anxiolytic-induced disorder              | SUD_ALL |
| F13.29  | Sedative, hypnotic or anxiolytic dependence with unspecified sedative, hypnotic or anxiolytic-induced disorder        | SUD_ALL |
| F13.90  | Sedative, hypnotic, or anxiolytic use, unspecified, uncomplicated                                                     | SUD_ALL |
| F13.920 | Sedative, hypnotic or anxiolytic use, unspecified with intoxication, uncomplicated                                    | SUD_ALL |
| F13.921 | Sedative, hypnotic or anxiolytic use, unspecified with intoxication delirium                                          | SUD_ALL |
| F13.929 | Sedative, hypnotic or anxiolytic use, unspecified with intoxication, unspecified                                      | SUD_ALL |
| F13.930 | Sedative, hypnotic or anxiolytic use, unspecified with withdrawal, uncomplicated                                      | SUD_ALL |
| F13.931 | Sedative, hypnotic or anxiolytic use, unspecified with withdrawal delirium                                            | SUD_ALL |

|         |                                                                                                                             |         |
|---------|-----------------------------------------------------------------------------------------------------------------------------|---------|
| F13.932 | Sedative, hypnotic or anxiolytic use, unspecified with withdrawal with perceptual disturbances                              | SUD_ALL |
| F13.939 | Sedative, hypnotic or anxiolytic use, unspecified with withdrawal, unspecified                                              | SUD_ALL |
| F13.96  | Sedative, hypnotic or anxiolytic use, unspecified with sedative, hypnotic or anxiolytic-induced persisting amnesic disorder | SUD_ALL |
| F13.97  | Sedative, hypnotic or anxiolytic use, unspecified with sedative, hypnotic or anxiolytic-induced persisting dementia         | SUD_ALL |
| F13.980 | Sedative, hypnotic or anxiolytic use, unspecified with sedative, hypnotic or anxiolytic-induced anxiety disorder            | SUD_ALL |
| F13.981 | Sedative, hypnotic or anxiolytic use, unspecified with sedative, hypnotic or anxiolytic-induced sexual dysfunction          | SUD_ALL |
| F13.982 | Sedative, hypnotic or anxiolytic use, unspecified with sedative, hypnotic or anxiolytic-induced sleep disorder              | SUD_ALL |
| F13.988 | Sedative, hypnotic or anxiolytic use, unspecified with other sedative, hypnotic or anxiolytic-induced disorder              | SUD_ALL |
| F13.99  | Sedative, hypnotic or anxiolytic use, unspecified with unspecified sedative, hypnotic or anxiolytic-induced disorder        | SUD_ALL |
| F14.10  | Cocaine abuse, uncomplicated                                                                                                | SUD_ALL |
| F14.11  | Cocaine abuse, in remission                                                                                                 | SUD_ALL |
| F14.120 | Cocaine abuse with intoxication, uncomplicated                                                                              | SUD_ALL |
| F14.121 | Cocaine abuse with intoxication with delirium                                                                               | SUD_ALL |
| F14.122 | Cocaine abuse with intoxication with perceptual disturbance                                                                 | SUD_ALL |
| F14.129 | Cocaine abuse with intoxication, unspecified                                                                                | SUD_ALL |
| F14.180 | Cocaine abuse with cocaine-induced anxiety disorder                                                                         | SUD_ALL |
| F14.181 | Cocaine abuse with cocaine-induced sexual dysfunction                                                                       | SUD_ALL |
| F14.182 | Cocaine abuse with cocaine-induced sleep disorder                                                                           | SUD_ALL |
| F14.188 | Cocaine abuse with other cocaine-induced disorder                                                                           | SUD_ALL |
| F14.19  | Cocaine abuse with unspecified cocaine-induced disorder                                                                     | SUD_ALL |
| F14.20  | Cocaine dependence, uncomplicated                                                                                           | SUD_ALL |
| F14.21  | Cocaine dependence, in remission                                                                                            | SUD_ALL |
| F14.220 | Cocaine dependence with intoxication, uncomplicated                                                                         | SUD_ALL |
| F14.221 | Cocaine dependence with intoxication delirium                                                                               | SUD_ALL |
| F14.222 | Cocaine dependence with intoxication with perceptual disturbance                                                            | SUD_ALL |
| F14.229 | Cocaine dependence with intoxication, unspecified                                                                           | SUD_ALL |
| F14.23  | Cocaine dependence with withdrawal                                                                                          | SUD_ALL |
| F14.280 | Cocaine dependence with cocaine-induced anxiety disorder                                                                    | SUD_ALL |
| F14.281 | Cocaine dependence with cocaine-induced sexual dysfunction                                                                  | SUD_ALL |
| F14.282 | Cocaine dependence with cocaine-induced sleep disorder                                                                      | SUD_ALL |
| F14.288 | Cocaine dependence with other cocaine-induced disorder                                                                      | SUD_ALL |
| F14.29  | Cocaine dependence with unspecified cocaine-induced disorder                                                                | SUD_ALL |
| F14.90  | Cocaine use, unspecified, uncomplicated                                                                                     | SUD_ALL |
| F14.920 | Cocaine use, unspecified with intoxication, uncomplicated                                                                   | SUD_ALL |
| F14.921 | Cocaine use, unspecified with intoxication delirium                                                                         | SUD_ALL |
| F14.922 | Cocaine use, unspecified with intoxication with perceptual disturbance                                                      | SUD_ALL |
| F14.929 | Cocaine use, unspecified with intoxication, unspecified                                                                     | SUD_ALL |

|         |                                                                                |         |
|---------|--------------------------------------------------------------------------------|---------|
| F14.980 | Cocaine use, unspecified with cocaine-induced anxiety disorder                 | SUD_ALL |
| F14.981 | Cocaine use, unspecified with cocaine-induced sexual dysfunction               | SUD_ALL |
| F14.982 | Cocaine use, unspecified with cocaine-induced sleep disorder                   | SUD_ALL |
| F14.988 | Cocaine use, unspecified with other cocaine-induced disorder                   | SUD_ALL |
| F14.99  | Cocaine use, unspecified with unspecified cocaine-induced disorder             | SUD_ALL |
| F15.10  | Other stimulant abuse, uncomplicated                                           | SUD_ALL |
| F15.11  | Other stimulant abuse, in remission                                            | SUD_ALL |
| F15.120 | Other stimulant abuse with intoxication, uncomplicated                         | SUD_ALL |
| F15.121 | Other stimulant abuse with intoxication delirium                               | SUD_ALL |
| F15.122 | Other stimulant abuse with intoxication with perceptual disturbance            | SUD_ALL |
| F15.129 | Other stimulant abuse with intoxication, unspecified                           | SUD_ALL |
| F15.180 | Other stimulant abuse with stimulant-induced anxiety disorder                  | SUD_ALL |
| F15.181 | Other stimulant abuse with stimulant-induced sexual dysfunction                | SUD_ALL |
| F15.182 | Other stimulant abuse with stimulant-induced sleep disorder                    | SUD_ALL |
| F15.188 | Other stimulant abuse with other stimulant-induced disorder                    | SUD_ALL |
| F15.19  | Other stimulant abuse with unspecified stimulant-induced disorder              | SUD_ALL |
| F15.20  | Other stimulant dependence, uncomplicated                                      | SUD_ALL |
| F15.21  | Other stimulant dependence, in remission                                       | SUD_ALL |
| F15.220 | Other stimulant dependence with intoxication, uncomplicated                    | SUD_ALL |
| F15.221 | Other stimulant dependence with intoxication delirium                          | SUD_ALL |
| F15.222 | Other stimulant dependence with intoxication with perceptual disturbance       | SUD_ALL |
| F15.229 | Other stimulant dependence with intoxication, unspecified                      | SUD_ALL |
| F15.23  | Other stimulant dependence with withdrawal                                     | SUD_ALL |
| F15.280 | Other stimulant dependence with stimulant-induced anxiety disorder             | SUD_ALL |
| F15.281 | Other stimulant dependence with stimulant-induced sexual dysfunction           | SUD_ALL |
| F15.282 | Other stimulant dependence with stimulant-induced sleep disorder               | SUD_ALL |
| F15.288 | Other stimulant dependence with other stimulant-induced disorder               | SUD_ALL |
| F15.29  | Other stimulant dependence with unspecified stimulant-induced disorder         | SUD_ALL |
| F15.90  | Other stimulant use, unspecified, uncomplicated                                | SUD_ALL |
| F15.920 | Other stimulant use, unspecified with intoxication, uncomplicated              | SUD_ALL |
| F15.921 | Other stimulant use, unspecified with intoxication delirium                    | SUD_ALL |
| F15.922 | Other stimulant use, unspecified with intoxication with perceptual disturbance | SUD_ALL |
| F15.929 | Other stimulant use, unspecified with intoxication, unspecified                | SUD_ALL |
| F15.93  | Other stimulant use, unspecified with withdrawal                               | SUD_ALL |
| F15.980 | Other stimulant use, unspecified with stimulant-induced anxiety disorder       | SUD_ALL |
| F15.981 | Other stimulant use, unspecified with stimulant-induced sexual dysfunction     | SUD_ALL |
| F15.982 | Other stimulant use, unspecified with stimulant-induced sleep disorder         | SUD_ALL |
| F15.988 | Other stimulant use, unspecified with other stimulant-induced disorder         | SUD_ALL |
| F15.99  | Other stimulant use, unspecified with unspecified stimulant-induced disorder   | SUD_ALL |
| F16.10  | Hallucinogen abuse, uncomplicated                                              | SUD_ALL |

|         |                                                                                             |         |
|---------|---------------------------------------------------------------------------------------------|---------|
| F16.11  | Hallucinogen abuse, in remission                                                            | SUD_ALL |
| F16.120 | Hallucinogen abuse with intoxication, uncomplicated                                         | SUD_ALL |
| F16.121 | Hallucinogen abuse with intoxication with delirium                                          | SUD_ALL |
| F16.122 | Hallucinogen abuse with intoxication with perceptual disturbance                            | SUD_ALL |
| F16.129 | Hallucinogen abuse with intoxication, unspecified                                           | SUD_ALL |
| F16.180 | Hallucinogen abuse with hallucinogen-induced anxiety disorder                               | SUD_ALL |
| F16.183 | Hallucinogen abuse with hallucinogen persisting perception disorder (flashbacks)            | SUD_ALL |
| F16.188 | Hallucinogen abuse with other hallucinogen-induced disorder                                 | SUD_ALL |
| F16.19  | Hallucinogen abuse with unspecified hallucinogen-induced disorder                           | SUD_ALL |
| F16.20  | Hallucinogen dependence, uncomplicated                                                      | SUD_ALL |
| F16.21  | Hallucinogen dependence, in remission                                                       | SUD_ALL |
| F16.220 | Hallucinogen dependence with intoxication, uncomplicated                                    | SUD_ALL |
| F16.221 | Hallucinogen dependence with intoxication with delirium                                     | SUD_ALL |
| F16.229 | Hallucinogen dependence with intoxication, unspecified                                      | SUD_ALL |
| F16.280 | Hallucinogen dependence with hallucinogen-induced anxiety disorder                          | SUD_ALL |
| F16.283 | Hallucinogen dependence with hallucinogen persisting perception disorder (flashbacks)       | SUD_ALL |
| F16.288 | Hallucinogen dependence with other hallucinogen-induced disorder                            | SUD_ALL |
| F16.29  | Hallucinogen dependence with unspecified hallucinogen-induced disorder                      | SUD_ALL |
| F16.90  | Hallucinogen use, unspecified, uncomplicated                                                | SUD_ALL |
| F16.920 | Hallucinogen use, unspecified with intoxication, uncomplicated                              | SUD_ALL |
| F16.921 | Hallucinogen use, unspecified with intoxication with delirium                               | SUD_ALL |
| F16.929 | Hallucinogen use, unspecified with intoxication, unspecified                                | SUD_ALL |
| F16.980 | Hallucinogen use, unspecified with hallucinogen-induced anxiety disorder                    | SUD_ALL |
| F16.983 | Hallucinogen use, unspecified with hallucinogen persisting perception disorder (flashbacks) | SUD_ALL |
| F16.988 | Hallucinogen use, unspecified with other hallucinogen-induced disorder                      | SUD_ALL |
| F16.99  | Hallucinogen use, unspecified with unspecified hallucinogen-induced disorder                | SUD_ALL |
| F18.10  | Inhalant abuse, uncomplicated                                                               | SUD_ALL |
| F18.11  | Inhalant abuse, in remission                                                                | SUD_ALL |
| F18.120 | Inhalant abuse with intoxication, uncomplicated                                             | SUD_ALL |
| F18.121 | Inhalant abuse with intoxication delirium                                                   | SUD_ALL |
| F18.129 | Inhalant abuse with intoxication, unspecified                                               | SUD_ALL |
| F18.17  | Inhalant abuse with inhalant-induced dementia                                               | SUD_ALL |
| F18.180 | Inhalant abuse with inhalant-induced anxiety disorder                                       | SUD_ALL |
| F18.188 | Inhalant abuse with other inhalant-induced disorder                                         | SUD_ALL |
| F18.19  | Inhalant abuse with unspecified inhalant-induced disorder                                   | SUD_ALL |
| F18.20  | Inhalant dependence, uncomplicated                                                          | SUD_ALL |
| F18.21  | Inhalant dependence, in remission                                                           | SUD_ALL |
| F18.220 | Inhalant dependence with intoxication, uncomplicated                                        | SUD_ALL |
| F18.221 | Inhalant dependence with intoxication delirium                                              | SUD_ALL |

|         |                                                                                                    |         |
|---------|----------------------------------------------------------------------------------------------------|---------|
| F18.229 | Inhalant dependence with intoxication, unspecified                                                 | SUD_ALL |
| F18.27  | Inhalant dependence with inhalant-induced dementia                                                 | SUD_ALL |
| F18.280 | Inhalant dependence with inhalant-induced anxiety disorder                                         | SUD_ALL |
| F18.288 | Inhalant dependence with other inhalant-induced disorder                                           | SUD_ALL |
| F18.29  | Inhalant dependence with unspecified inhalant-induced disorder                                     | SUD_ALL |
| F18.90  | Inhalant use, unspecified, uncomplicated                                                           | SUD_ALL |
| F18.920 | Inhalant use, unspecified with intoxication, uncomplicated                                         | SUD_ALL |
| F18.921 | Inhalant use, unspecified with intoxication with delirium                                          | SUD_ALL |
| F18.929 | Inhalant use, unspecified with intoxication, unspecified                                           | SUD_ALL |
| F18.97  | Inhalant use, unspecified with inhalant-induced persisting dementia                                | SUD_ALL |
| F18.980 | Inhalant use, unspecified with inhalant-induced anxiety disorder                                   | SUD_ALL |
| F18.988 | Inhalant use, unspecified with other inhalant-induced disorder                                     | SUD_ALL |
| F18.99  | Inhalant use, unspecified with unspecified inhalant-induced disorder                               | SUD_ALL |
| F19.10  | Other psychoactive substance abuse, uncomplicated                                                  | SUD_ALL |
| F19.11  | Other psychoactive substance abuse, in remission                                                   | SUD_ALL |
| F19.120 | Other psychoactive substance abuse with intoxication, uncomplicated                                | SUD_ALL |
| F19.121 | Other psychoactive substance abuse with intoxication delirium                                      | SUD_ALL |
| F19.122 | Other psychoactive substance abuse with intoxication with perceptual disturbances                  | SUD_ALL |
| F19.129 | Other psychoactive substance abuse with intoxication, unspecified                                  | SUD_ALL |
| F19.16  | Other psychoactive substance abuse with psychoactive substance-induced persisting amnesic disorder | SUD_ALL |
| F19.17  | Other psychoactive substance abuse with psychoactive substance-induced persisting dementia         | SUD_ALL |
| F19.180 | Other psychoactive substance abuse with psychoactive substance-induced anxiety disorder            | SUD_ALL |
| F19.181 | Other psychoactive substance abuse with psychoactive substance-induced sexual dysfunction          | SUD_ALL |
| F19.182 | Other psychoactive substance abuse with psychoactive substance-induced sleep disorder              | SUD_ALL |
| F19.188 | Other psychoactive substance abuse with other psychoactive substance-induced disorder              | SUD_ALL |
| F19.19  | Other psychoactive substance abuse with unspecified psychoactive substance-induced disorder        | SUD_ALL |
| F19.20  | Other psychoactive substance dependence, uncomplicated                                             | SUD_ALL |
| F19.21  | Other psychoactive substance dependence, in remission                                              | SUD_ALL |
| F19.220 | Other psychoactive substance dependence with intoxication, uncomplicated                           | SUD_ALL |
| F19.221 | Other psychoactive substance dependence with intoxication delirium                                 | SUD_ALL |
| F19.222 | Other psychoactive substance dependence with intoxication with perceptual disturbance              | SUD_ALL |
| F19.229 | Other psychoactive substance dependence with intoxication, unspecified                             | SUD_ALL |
| F19.230 | Other psychoactive substance dependence with withdrawal, uncomplicated                             | SUD_ALL |
| F19.231 | Other psychoactive substance dependence with withdrawal delirium                                   | SUD_ALL |
| F19.232 | Other psychoactive substance dependence with withdrawal with perceptual disturbance                | SUD_ALL |
| F19.239 | Other psychoactive substance dependence with withdrawal, unspecified                               | SUD_ALL |



|         |                                                                                                               |         |
|---------|---------------------------------------------------------------------------------------------------------------|---------|
| F19.26  | Other psychoactive substance dependence with psychoactive substance-induced persisting amnesic disorder       | SUD_ALL |
| F19.27  | Other psychoactive substance dependence with psychoactive substance-induced persisting dementia               | SUD_ALL |
| F19.280 | Other psychoactive substance dependence with psychoactive substance-induced anxiety disorder                  | SUD_ALL |
| F19.281 | Other psychoactive substance dependence with psychoactive substance-induced sexual dysfunction                | SUD_ALL |
| F19.282 | Other psychoactive substance dependence with psychoactive substance-induced sleep disorder                    | SUD_ALL |
| F19.288 | Other psychoactive substance dependence with other psychoactive substance-induced disorder                    | SUD_ALL |
| F19.29  | Other psychoactive substance dependence with unspecified psychoactive substance-induced disorder              | SUD_ALL |
| F19.90  | Other psychoactive substance use, unspecified, uncomplicated                                                  | SUD_ALL |
| F19.920 | Other psychoactive substance use, unspecified with intoxication, uncomplicated                                | SUD_ALL |
| F19.921 | Other psychoactive substance use, unspecified with intoxication with delirium                                 | SUD_ALL |
| F19.922 | Other psychoactive substance use, unspecified with intoxication with perceptual disturbance                   | SUD_ALL |
| F19.929 | Other psychoactive substance use, unspecified with intoxication, unspecified                                  | SUD_ALL |
| F19.930 | Other psychoactive substance use, unspecified with withdrawal, uncomplicated                                  | SUD_ALL |
| F19.931 | Other psychoactive substance use, unspecified with withdrawal delirium                                        | SUD_ALL |
| F19.932 | Other psychoactive substance use, unspecified with withdrawal with perceptual disturbance                     | SUD_ALL |
| F19.939 | Other psychoactive substance use, unspecified with withdrawal, unspecified                                    | SUD_ALL |
| F19.96  | Other psychoactive substance use, unspecified with psychoactive substance-induced persisting amnesic disorder | SUD_ALL |
| F19.97  | Other psychoactive substance use, unspecified with psychoactive substance-induced persisting dementia         | SUD_ALL |
| F19.980 | Other psychoactive substance use, unspecified with psychoactive substance-induced anxiety disorder            | SUD_ALL |
| F19.981 | Other psychoactive substance use, unspecified with psychoactive substance-induced sexual dysfunction          | SUD_ALL |
| F19.982 | Other psychoactive substance use, unspecified with psychoactive substance-induced sleep disorder              | SUD_ALL |
| F19.988 | Other psychoactive substance use, unspecified with other psychoactive substance-induced disorder              | SUD_ALL |
| F19.99  | Other psychoactive substance use, unspecified with unspecified psychoactive substance-induced disorder        | SUD_ALL |

**Behavioral Health Current Procedural Terminology (CPT) and Healthcare Common Procedure Coding System (HCPCS) Codes**

| CPT/HCPCS | Description                 | Behavioral Health Taxonomy Required? |
|-----------|-----------------------------|--------------------------------------|
| 90785     | Psytx complex interactive   | 0                                    |
| 90791     | Psych diagnostic evaluation | 0                                    |

|       |                                                                                                                                                                                                                                                                                                                                                                                                                                                                                                                  |   |
|-------|------------------------------------------------------------------------------------------------------------------------------------------------------------------------------------------------------------------------------------------------------------------------------------------------------------------------------------------------------------------------------------------------------------------------------------------------------------------------------------------------------------------|---|
| 90792 | Psychiatric Diagnostic Evaluation with Medical Services– This code is used for an initial diagnostic interview exam for an adult or adolescent patient that includes medical services. It includes a chief complaint, history of present illness, review of pertinent systems, family and psychosocial history, and complete mental status examination, as well as any medical work such as the ordering and medical interpretation of laboratory or other diagnostic studies or the prescribing of medications. | 0 |
| 90801 | Interview evaluation (psychotherapy)                                                                                                                                                                                                                                                                                                                                                                                                                                                                             | 0 |
| 90802 |                                                                                                                                                                                                                                                                                                                                                                                                                                                                                                                  | 0 |
| 90803 |                                                                                                                                                                                                                                                                                                                                                                                                                                                                                                                  | 0 |
| 90804 | Individual therapy 20 – 30 min (psychotherapy)                                                                                                                                                                                                                                                                                                                                                                                                                                                                   | 0 |
| 90805 |                                                                                                                                                                                                                                                                                                                                                                                                                                                                                                                  | 0 |
| 90806 | Individual psychotherapy, insight oriented, behavior modifying and/or                                                                                                                                                                                                                                                                                                                                                                                                                                            | 0 |
| 90807 | Individual psychotherapy approximately 45 – 50 minutes face to face, with medical evaluation and management services                                                                                                                                                                                                                                                                                                                                                                                             | 0 |
| 90808 | 75-80 minutes psychotherapy                                                                                                                                                                                                                                                                                                                                                                                                                                                                                      | 0 |
| 90809 | individual psychotherapy                                                                                                                                                                                                                                                                                                                                                                                                                                                                                         | 0 |
| 90810 | Interactive psychotherapy                                                                                                                                                                                                                                                                                                                                                                                                                                                                                        | 0 |
| 90811 | Interactive psychotherapy                                                                                                                                                                                                                                                                                                                                                                                                                                                                                        | 0 |
| 90812 | Interactive psychotherapy                                                                                                                                                                                                                                                                                                                                                                                                                                                                                        | 0 |
| 90813 | Interactive psychotherapy                                                                                                                                                                                                                                                                                                                                                                                                                                                                                        | 0 |
| 90814 | Interactive psychotherapy                                                                                                                                                                                                                                                                                                                                                                                                                                                                                        | 0 |
| 90815 | Interactive psychotherapy                                                                                                                                                                                                                                                                                                                                                                                                                                                                                        | 0 |
| 90816 | Individual Psychotherapy                                                                                                                                                                                                                                                                                                                                                                                                                                                                                         | 0 |
| 90820 | Interactive medical psychiatric diagnostic interview examination                                                                                                                                                                                                                                                                                                                                                                                                                                                 | 0 |
| 90830 | Psychological testing                                                                                                                                                                                                                                                                                                                                                                                                                                                                                            | 0 |
| 90831 | Telephone call consultation                                                                                                                                                                                                                                                                                                                                                                                                                                                                                      | 1 |
| 90832 | Psychotherapy, 30 minutes                                                                                                                                                                                                                                                                                                                                                                                                                                                                                        | 0 |
| 90833 | Psychotherapy, 30 minutes with patient when performed with an evaluation and management service (List separately in addition to the code for primary procedure)                                                                                                                                                                                                                                                                                                                                                  | 0 |
| 90834 | Individual Psychotherapy, 45 minutes with patient and/or family member                                                                                                                                                                                                                                                                                                                                                                                                                                           | 0 |
| 90835 | Narcosynthesis for psychiatric diagnostic and therapeutic purposes                                                                                                                                                                                                                                                                                                                                                                                                                                               | 0 |
| 90836 | Individual Psychotherapy, 45 minutes with patient and/or family member when performed with an evaluation and management service                                                                                                                                                                                                                                                                                                                                                                                  | 0 |
| 90837 | Individual Psychotherapy, 60 minutes with patient and/or family member                                                                                                                                                                                                                                                                                                                                                                                                                                           | 0 |
| 90838 | Individual Psychotherapy, 60 minutes with patient and/or family member when performed with an evaluation and management service                                                                                                                                                                                                                                                                                                                                                                                  | 0 |
| 90839 | Under Psychotherapy for Crisis Services and Procedures                                                                                                                                                                                                                                                                                                                                                                                                                                                           | 0 |
| 90840 | Psychotherapy for crisis; each additional 30 minutes (List separately in addition to code for primary service)                                                                                                                                                                                                                                                                                                                                                                                                   | 0 |
| 90841 | Individual psychotherapy, time unspecified                                                                                                                                                                                                                                                                                                                                                                                                                                                                       | 0 |
| 90842 | Individual psychotherapy, 75-80 min                                                                                                                                                                                                                                                                                                                                                                                                                                                                              | 0 |

|       |                                                                                                                                                                                                                                                                                                                                                                                                                                                                                                                                              |   |
|-------|----------------------------------------------------------------------------------------------------------------------------------------------------------------------------------------------------------------------------------------------------------------------------------------------------------------------------------------------------------------------------------------------------------------------------------------------------------------------------------------------------------------------------------------------|---|
| 90843 | Individual psychotherapy, 20-30 min                                                                                                                                                                                                                                                                                                                                                                                                                                                                                                          | 0 |
| 90844 | Individual psychotherapy, 45-50 min                                                                                                                                                                                                                                                                                                                                                                                                                                                                                                          | 0 |
| 90845 | Psychoanalysis                                                                                                                                                                                                                                                                                                                                                                                                                                                                                                                               | 0 |
| 90846 | face-to-face or telehealth family psychotherapy sessions of 26 minutes or longer, patient not present                                                                                                                                                                                                                                                                                                                                                                                                                                        | 0 |
| 90847 | “Family Psychotherapy (Conjoint Psychotherapy) (With Patient Present) – This code is used when the therapy includes the patient and family members.                                                                                                                                                                                                                                                                                                                                                                                          | 0 |
| 90848 | Family psychotherapy with patient present                                                                                                                                                                                                                                                                                                                                                                                                                                                                                                    | 0 |
| 90849 | Multiple-Family Group Psychotherapy – This code is used when the psychiatrist provides psychotherapy to a group of adult or adolescent patients and their family members. The usual treatment strategy is to modify family behavior and attitudes.                                                                                                                                                                                                                                                                                           | 0 |
| 90850 | NA                                                                                                                                                                                                                                                                                                                                                                                                                                                                                                                                           | 0 |
| 90851 | NA                                                                                                                                                                                                                                                                                                                                                                                                                                                                                                                                           | 0 |
| 90852 | NA                                                                                                                                                                                                                                                                                                                                                                                                                                                                                                                                           | 0 |
| 90853 | Group Psychotherapy (Other Than of a Multiple-Family Group) – This code relies on the use of interactions of group members to examine the pathology of each individual within the group. In addition, the dynamics of the entire group are noted and used to modify behaviors and attitudes of the patient members. The size of the group may vary depending on the therapeutic goals of the group and/or the type of therapeutic interactions used by the therapist. The code is used to report per-session services for each group member. | 0 |
| 90854 | Psychiatric procedure                                                                                                                                                                                                                                                                                                                                                                                                                                                                                                                        | 0 |
| 90855 | interactive individual medical psychotherapy                                                                                                                                                                                                                                                                                                                                                                                                                                                                                                 | 0 |
| 90856 | NA                                                                                                                                                                                                                                                                                                                                                                                                                                                                                                                                           | 0 |
| 90857 | Interactive group therapy                                                                                                                                                                                                                                                                                                                                                                                                                                                                                                                    | 0 |
| 90858 | NA                                                                                                                                                                                                                                                                                                                                                                                                                                                                                                                                           | 0 |
| 90859 | NA                                                                                                                                                                                                                                                                                                                                                                                                                                                                                                                                           | 0 |
| 90860 | NA                                                                                                                                                                                                                                                                                                                                                                                                                                                                                                                                           | 0 |
| 90861 | NA                                                                                                                                                                                                                                                                                                                                                                                                                                                                                                                                           | 0 |
| 90862 | Psychiatric medication management                                                                                                                                                                                                                                                                                                                                                                                                                                                                                                            | 0 |
| 90863 | Pharmacologic management, including prescription and review of medication, when performed with psychotherapy services (List separately in addition to the code for primary procedure)                                                                                                                                                                                                                                                                                                                                                        | 1 |
| 90864 | NA                                                                                                                                                                                                                                                                                                                                                                                                                                                                                                                                           | 0 |
| 90865 | Narcosynthesis for Psychiatric Diagnostic and Therapeutic Purposes: – This procedure involves the administration, usually through slow intravenous infusion, of a barbiturate or a benzodiazepine in order to suppress inhibitions, allowing the patient to reveal and discuss material that cannot be verbalized without the disinhibiting effect of the medication                                                                                                                                                                         | 0 |
| 90866 | NA                                                                                                                                                                                                                                                                                                                                                                                                                                                                                                                                           | 0 |
| 90867 | Therapeutic repetitive transcranial magnetic stimulation (TMS) treatment; initial, including cortical mapping, motor threshold determination, delivery and management                                                                                                                                                                                                                                                                                                                                                                        | 0 |

|       |                                                                                                                                                                                                                                                                                                                                                                                                                                                                                                                                |   |
|-------|--------------------------------------------------------------------------------------------------------------------------------------------------------------------------------------------------------------------------------------------------------------------------------------------------------------------------------------------------------------------------------------------------------------------------------------------------------------------------------------------------------------------------------|---|
| 90868 | Therapeutic repetitive transcranial magnetic stimulation (TMS) treatment; subsequent delivery and management, per session                                                                                                                                                                                                                                                                                                                                                                                                      | 0 |
| 90869 | Therapeutic repetitive transcranial magnetic stimulation (TMS) treatment; subsequent motor threshold re-determination with delivery and management                                                                                                                                                                                                                                                                                                                                                                             | 0 |
| 90870 | Electroconvulsive Therapy (Includes Necessary Monitoring); Single seizure – This code is for electroconvulsive therapy (ECT), which involves the application of electric current to the patient’s brain for the purposes of producing a seizure or series of seizures to alleviate mental symptoms. ECT is used primarily for the treatment of depression that does not respond to medication. The code includes the time the physician takes to monitor the patient during the convulsive phase and during the recovery phase | 0 |
| 90871 | ECT                                                                                                                                                                                                                                                                                                                                                                                                                                                                                                                            | 0 |
| 90872 | Outpatient psychiatric diagnostic evaluation                                                                                                                                                                                                                                                                                                                                                                                                                                                                                   | 0 |
| 90873 | NA                                                                                                                                                                                                                                                                                                                                                                                                                                                                                                                             | 0 |
| 90874 | Individual Psychotherapy?                                                                                                                                                                                                                                                                                                                                                                                                                                                                                                      | 0 |
| 90875 | Individual psychophysiological therapy incorporating biofeedback training by any modality (face-to-face with the patient), with psychotherapy (eg, insight oriented, behavior modifying or supportive psychotherapy); 30 minutes                                                                                                                                                                                                                                                                                               | 0 |
| 90876 | Individual Psychophysiological Therapy Incorporating Biofeedback Training by any Modality (face-to-face with the patient), With Psychotherapy (e.g., insight-oriented, behavior modifying, or supportive psychotherapy; approximately 45-50 minutes                                                                                                                                                                                                                                                                            | 0 |
| 90877 | Psychiatric hypnotherapy                                                                                                                                                                                                                                                                                                                                                                                                                                                                                                       | 0 |
| 90878 | NA                                                                                                                                                                                                                                                                                                                                                                                                                                                                                                                             | 0 |
| 90879 | NA                                                                                                                                                                                                                                                                                                                                                                                                                                                                                                                             | 0 |
| 90880 | Hypnotherapy – Hypnosis is the procedure of inducing a passive state in which the patient demonstrates increased amenability and responsiveness to suggestions and commands, provided they do not conflict seriously with the patient’s conscious or unconscious wishes. Hypnotherapy may be used for either diagnostic or treatment purposes.                                                                                                                                                                                 | 0 |
| 90881 | NA                                                                                                                                                                                                                                                                                                                                                                                                                                                                                                                             | 0 |
| 90883 | NA                                                                                                                                                                                                                                                                                                                                                                                                                                                                                                                             | 0 |
| 90884 | Individual therapy                                                                                                                                                                                                                                                                                                                                                                                                                                                                                                             | 0 |
| 90886 | NA                                                                                                                                                                                                                                                                                                                                                                                                                                                                                                                             | 0 |
| 90887 | Interpretation or explanation of results of psychiatric, other medical examinations and procedures, or other accumulated data to family or other responsible persons, or advising them how to assist patient                                                                                                                                                                                                                                                                                                                   | 0 |
| 90888 | NA                                                                                                                                                                                                                                                                                                                                                                                                                                                                                                                             | 0 |
| 90889 | NA                                                                                                                                                                                                                                                                                                                                                                                                                                                                                                                             | 0 |
| 90890 | NA                                                                                                                                                                                                                                                                                                                                                                                                                                                                                                                             | 0 |
| 90891 | NA                                                                                                                                                                                                                                                                                                                                                                                                                                                                                                                             | 0 |
| 90892 | NA                                                                                                                                                                                                                                                                                                                                                                                                                                                                                                                             | 0 |
| 90893 | NA                                                                                                                                                                                                                                                                                                                                                                                                                                                                                                                             | 0 |
| 90894 | ?modifier code vs retired code                                                                                                                                                                                                                                                                                                                                                                                                                                                                                                 | 0 |

|       |                                                                                                                                                                                                                                                                                                                                                                 |   |
|-------|-----------------------------------------------------------------------------------------------------------------------------------------------------------------------------------------------------------------------------------------------------------------------------------------------------------------------------------------------------------------|---|
| 90895 | NA                                                                                                                                                                                                                                                                                                                                                              | 0 |
| 90896 | ?modifier code vs retired code                                                                                                                                                                                                                                                                                                                                  | 0 |
| 90897 | NA                                                                                                                                                                                                                                                                                                                                                              | 0 |
| 90898 | NA                                                                                                                                                                                                                                                                                                                                                              | 0 |
| 90899 | “Unlisted Psychiatric Service or Procedure – This code is used for services not specifically defined under another code. It might also be used for procedures that require some degree of explanation or justification                                                                                                                                          | 0 |
| 93000 | Electrocardiogram complete                                                                                                                                                                                                                                                                                                                                      | 1 |
| 93005 | Electrocardiogram tracing                                                                                                                                                                                                                                                                                                                                       | 1 |
| 93010 | Electrocardiogram report                                                                                                                                                                                                                                                                                                                                        | 1 |
| 95883 | Neuropsych testing                                                                                                                                                                                                                                                                                                                                              | 0 |
| 96100 | Psychological testing                                                                                                                                                                                                                                                                                                                                           | 0 |
| 96101 | Psychological testing (includes psychodiagnostic assessment of emotionality, intellectual abilities, personality and psychopathology, eg, MMPI, Rorschach, WAIS), per hour of the psychologist's or physician's time, both face-to-face time administering tests to the patient and time interpreting these test results and preparing the report               | 0 |
| 96102 | Psychological testing (includes psychodiagnostic assessment of emotionality, intellectual abilities, personality and psychopathology, e.g. MMPI, and WAIS), with qualified health care professional interpretation and report, administered by technician, per hour of technician time, face-to-face                                                            | 0 |
| 96103 | Computer administered, computer graded, psychologic assessment, overseen by a qualified healthcare provider. A qualified healthcare provider may include, but is not limited to psychiatrist or other mental health professional.                                                                                                                               | 0 |
| 96105 | Assessment of aphasia                                                                                                                                                                                                                                                                                                                                           | 1 |
| 96116 | Neurobehavioral status exam (clinical assessment of thinking, reasoning and judgment, eg, acquired knowledge, attention, language, memory, planning and problem solving, and visual spatial abilities), per hour of the psychologist's or physician's time, both face-to-face time with the patient and time interpreting test results and preparing the report | 1 |
| 96117 | Neuropsych testing                                                                                                                                                                                                                                                                                                                                              | 1 |
| 96118 | Neuropsychological testing (eg, Halstead-Reitan Neuropsychological Battery, Wechsler Memory Scales and Wisconsin Card Sorting Test), per hour of the psychologist's or physician's time, both face-to-face time administering tests to the patient and time interpreting these test results and preparing the report                                            | 1 |
| 96119 | Neuropsychological testing (eg, Halstead-Reitan Neuropsychological Battery, Wechsler Memory Scales and Wisconsin Card Sorting Test), with qualified health care professional interpretation and report, administered by technician, per hour of technician time, face-to-face                                                                                   | 1 |
| 96120 | Neuropsychological testing (eg, Wisconsin Card Sorting Test), administered by a computer, with qualified health care professional interpretation and report                                                                                                                                                                                                     | 1 |
| 96121 | NUBHVL XM PHY/QHP EA ADDL HR                                                                                                                                                                                                                                                                                                                                    | 1 |
| 96122 | NA                                                                                                                                                                                                                                                                                                                                                              | 0 |

|       |                                                                                                                                                                                                                                                                              |   |
|-------|------------------------------------------------------------------------------------------------------------------------------------------------------------------------------------------------------------------------------------------------------------------------------|---|
| 96123 | NA                                                                                                                                                                                                                                                                           | 0 |
| 96124 | NA                                                                                                                                                                                                                                                                           | 0 |
| 96125 | Standardized cognitive performance testing (eg, Ross Information Processing Assessment) per hour of a qualified health care professional's time, both face-to-face time administering tests to the patient and time interpreting these test results and preparing the report | 1 |
| 96126 | NA                                                                                                                                                                                                                                                                           | 0 |
| 96127 | Brief emotional/behavioral assessment (eg, depression inventory, attention-deficit/hyperactivity disorder [ADHD] scale), with scoring and documentation, per standardized instrument                                                                                         | 0 |
| 96128 | NA                                                                                                                                                                                                                                                                           | 0 |
| 96129 | Neuropsych testing                                                                                                                                                                                                                                                           | 1 |
| 96130 | PSYCL TST EVAL PHYS/QHP 1ST                                                                                                                                                                                                                                                  | 0 |
| 96131 | PSYCL TST EVAL PHYS/QHP EA                                                                                                                                                                                                                                                   | 0 |
| 96132 | NRPSYC TST EVAL PHYS/QHP 1ST                                                                                                                                                                                                                                                 | 1 |
| 96133 | NRPSYC TST EVAL PHYS/QHP EA                                                                                                                                                                                                                                                  | 1 |
| 96134 | NA                                                                                                                                                                                                                                                                           | 0 |
| 96135 | NA                                                                                                                                                                                                                                                                           | 0 |
| 96136 | PSYCL/NRPSYC TST PHY/QHP 1ST                                                                                                                                                                                                                                                 | 0 |
| 96137 | PSYCL/NRPSYC TST PHY/QHP EA                                                                                                                                                                                                                                                  | 0 |
| 96138 | PSYCL/NRPSYC TECH 1ST                                                                                                                                                                                                                                                        | 0 |
| 96139 | PSYCL/NRPSYC TST TECH EA                                                                                                                                                                                                                                                     | 0 |
| 96140 | NA                                                                                                                                                                                                                                                                           | 0 |
| 96141 | NA                                                                                                                                                                                                                                                                           | 0 |
| 96142 | NA                                                                                                                                                                                                                                                                           | 0 |
| 96143 | NA                                                                                                                                                                                                                                                                           | 0 |
| 96144 | NA                                                                                                                                                                                                                                                                           | 0 |
| 96145 | NA                                                                                                                                                                                                                                                                           | 0 |
| 96146 | PSYCL/NRPSYC TST AUTO RESULT                                                                                                                                                                                                                                                 | 0 |
| 96147 | NA                                                                                                                                                                                                                                                                           | 0 |
| 96148 | NA                                                                                                                                                                                                                                                                           | 0 |
| 96149 | NA                                                                                                                                                                                                                                                                           | 0 |
| 96150 | Health and behavior assessment (eg, health-focused clinical interview, behavioral observations, psychophysiological monitoring, health-oriented questionnaires), each 15 minutes face-to-face with the patient; initial assessment                                           | 1 |
| 96151 | Health and behavior assessment (eg, health-focused clinical interview, behavioral observations, psychophysiological monitoring, health-oriented questionnaires), each 15 minutes face-to-face with the patient; re-assessment                                                | 1 |
| 96152 | Health and behavior intervention, each 15 minutes, face-to-face; individual                                                                                                                                                                                                  | 1 |
| 96153 | Health and behavior intervention, each 15 minutes, face-to-face; group (2 or more patients)                                                                                                                                                                                  | 1 |

|       |                                                                                                                                                                                                                                                                                                                                                          |   |
|-------|----------------------------------------------------------------------------------------------------------------------------------------------------------------------------------------------------------------------------------------------------------------------------------------------------------------------------------------------------------|---|
| 96154 | Health and behavior intervention, each 15 minutes, face-to-face; family (with the patient present)                                                                                                                                                                                                                                                       | 1 |
| 96155 | Interv hlth/behav fam no pt                                                                                                                                                                                                                                                                                                                              | 1 |
| 96156 | Health Behavior Assessment and Reassessment                                                                                                                                                                                                                                                                                                              | 0 |
| 96157 |                                                                                                                                                                                                                                                                                                                                                          | 0 |
| 96158 | Health Behavior Intervention                                                                                                                                                                                                                                                                                                                             | 0 |
| 96159 | Health Behavior Intervention                                                                                                                                                                                                                                                                                                                             | 0 |
| 96160 | Health Risk Assessment                                                                                                                                                                                                                                                                                                                                   | 0 |
| 96161 | Health Risk Assessment                                                                                                                                                                                                                                                                                                                                   | 0 |
| 97127 | THERAPEUTIC INTERVENTIONS THAT FOCUS ON COGNITIVE FUNCTION (EG, ATTENTION, MEMORY, REASONING, EXECUTIVE FUNCTION, PROBLEM SOLVING, AND/OR PRAGMATIC FUNCTIONING) AND COMPENSATORY STRATEGIES TO MANAGE THE PERFORMANCE OF AN ACTIVITY (EG, MANAGING TIME OR SCHEDULES, INITIATING, ORGANIZING AND SEQUENCING TASKS), DIRECT (ONE-ON-ONE) PATIENT CONTACT | 0 |
| 97151 | BHV ID ASSMT BY PHYS/QHP                                                                                                                                                                                                                                                                                                                                 | 1 |
| 97152 | BHV ID SUPRT ASSMT BY 1 TECH                                                                                                                                                                                                                                                                                                                             | 1 |
| 97153 | ADAPTIVE BEHAVIOR TX BY TECH                                                                                                                                                                                                                                                                                                                             | 0 |
| 97154 | GRP ADAPT BHV TX BY TECH                                                                                                                                                                                                                                                                                                                                 | 0 |
| 97155 | ADAPT BEHAVIOR TX PHYS/QHP                                                                                                                                                                                                                                                                                                                               | 1 |
| 97156 | FAM ADAPT BHV TX GDN PHY/QHP                                                                                                                                                                                                                                                                                                                             | 1 |
| 97157 | MULT FAM ADAPT BHV TX GDN                                                                                                                                                                                                                                                                                                                                | 1 |
| 97158 | GRP ADAPT BHV TX BY PHY/QHP                                                                                                                                                                                                                                                                                                                              | 0 |
| 97532 | Cognitive skills (older code)                                                                                                                                                                                                                                                                                                                            | 1 |
| 98960 | Education and training for patient self-management by a qualified, nonphysician health care professional using a standardized curriculum, face-to-face with the patient (could include caregiver/family) each 30 minutes; individual patient                                                                                                             | 1 |
| 98961 | Education and training for patient self-management by a qualified, nonphysician health care professional using a standardized curriculum, face-to-face with the patient (could include caregiver/family) each 30 minutes; 2-4 patients                                                                                                                   | 1 |
| 98962 | Education and training for patient self-management by a qualified, nonphysician health care professional using a standardized curriculum, face-to-face with the patient (could include caregiver/family) each 30 minutes; 5-8 patients                                                                                                                   | 1 |
| 98966 | Non-Face-to-Face Nonphysician Telephone Services                                                                                                                                                                                                                                                                                                         | 1 |
| 98967 | Non-Face-to-Face Nonphysician Telephone Services                                                                                                                                                                                                                                                                                                         | 1 |
| 98968 | Non-Face-to-Face Nonphysician Telephone Services                                                                                                                                                                                                                                                                                                         | 1 |
| 99058 | Service(s) provided on an emergency basis in the office, which disrupts other scheduled office services, in addition to basic service                                                                                                                                                                                                                    | 1 |
| 99078 | Group health education                                                                                                                                                                                                                                                                                                                                   | 1 |
| 99201 | Office/outpatient visit new                                                                                                                                                                                                                                                                                                                              | 1 |
| 99202 | Office/outpatient visit new                                                                                                                                                                                                                                                                                                                              | 1 |
| 99203 | Office/outpatient visit new                                                                                                                                                                                                                                                                                                                              | 1 |

|       |                                                                                                                                                                                                                                                                                                                                                                    |   |
|-------|--------------------------------------------------------------------------------------------------------------------------------------------------------------------------------------------------------------------------------------------------------------------------------------------------------------------------------------------------------------------|---|
| 99204 | Office/outpatient visit new                                                                                                                                                                                                                                                                                                                                        | 1 |
| 99205 | Office/outpatient visit new                                                                                                                                                                                                                                                                                                                                        | 1 |
| 99211 | Office/outpatient visit est                                                                                                                                                                                                                                                                                                                                        | 1 |
| 99212 | Office/outpatient visit est                                                                                                                                                                                                                                                                                                                                        | 1 |
| 99213 | Office/outpatient visit est                                                                                                                                                                                                                                                                                                                                        | 1 |
| 99214 | Office/outpatient visit est                                                                                                                                                                                                                                                                                                                                        | 1 |
| 99215 | Office/outpatient visit est                                                                                                                                                                                                                                                                                                                                        | 1 |
| 99354 | Prolonged evaluation and management or psychotherapy service(s) (beyond the typical service time of the primary procedure) in the office or other outpatient setting requiring direct patient contact beyond the usual service; first hour (List separately in addition to code for office or other outpatient Evaluation and Management or psychotherapy service) | 1 |
| 99355 | Prolonged evaluation and management or psychotherapy service(s) (beyond the typical service time of the primary procedure) in the office or other outpatient setting requiring direct patient contact beyond the usual service; each additional 30 minutes (List separately in addition to code for prolonged service)                                             | 1 |
| 99357 | Prolonged service in the inpatient or observation setting, requiring unit/floor time beyond the usual service                                                                                                                                                                                                                                                      | 1 |
| 99365 | Therapeutic, Prophylactic, and Diagnostic Injections and Infusions                                                                                                                                                                                                                                                                                                 | 1 |
| 99366 | Medical Team Conference, Direct (Face-to-Face) Contact With Patient and/or Family                                                                                                                                                                                                                                                                                  | 1 |
| 99367 | Medical team conference with interdisciplinary team of health care professionals, patient and/or family not present, 30 minutes or more; participation by physician                                                                                                                                                                                                | 1 |
| 99385 | Ages 18-39                                                                                                                                                                                                                                                                                                                                                         | 1 |
| 99386 | Ages 40-64                                                                                                                                                                                                                                                                                                                                                         | 1 |
| 99387 | Ages 65+                                                                                                                                                                                                                                                                                                                                                           | 1 |
| 99395 | Ages 18-39                                                                                                                                                                                                                                                                                                                                                         | 1 |
| 99396 | Ages 40-64                                                                                                                                                                                                                                                                                                                                                         | 1 |
| 99397 | Ages 65+                                                                                                                                                                                                                                                                                                                                                           | 1 |
| 99401 | Preventive medicine counseling and/or risk factor reduction intervention(s) provided to an individual (separate procedure)                                                                                                                                                                                                                                         | 1 |
| 99402 | Preventive medicine counseling and/or risk factor reduction intervention(s) provided to an individual (separate procedure); approximately 30 minutes                                                                                                                                                                                                               | 1 |
| 99403 | Preventive medicine counseling and/or risk factor reduction intervention(s) provided to an individual (separate procedure); approximately 45 minutes                                                                                                                                                                                                               | 1 |
| 99404 | Preventive medicine counseling and/or risk factor reduction intervention(s) provided to an individual (separate procedure); approximately 60 minutes                                                                                                                                                                                                               | 1 |
| 99408 | Alcohol and/or Substance abuse structured screening and brief intervention                                                                                                                                                                                                                                                                                         | 1 |
| 99409 | Alcohol and/or substance (other than tobacco) abuse structured screening (eg, AUDIT, DAST), and brief intervention (SBI) services; greater than 30 minutes                                                                                                                                                                                                         | 1 |
| 99411 | Preventive medicine counseling and/or risk factor reduction intervention(s) provided to individuals in a group setting (separate procedure); approximately 30 minutes                                                                                                                                                                                              | 1 |



|       |                                                                                                                                                                                                                                                                                                                                                                                                                                           |   |
|-------|-------------------------------------------------------------------------------------------------------------------------------------------------------------------------------------------------------------------------------------------------------------------------------------------------------------------------------------------------------------------------------------------------------------------------------------------|---|
| 99412 | Preventive medicine counseling and/or risk factor reduction intervention(s) provided to individuals in a group setting (separate procedure); approximately 60 minutes                                                                                                                                                                                                                                                                     | 1 |
| 99415 | Prolonged clinical staff service (the service beyond the typical service time) during an evaluation and management service in the office or outpatient setting, direct patient contact with physician supervision; first hour (List separately in addition to code for outpatient Evaluation and Management service)                                                                                                                      | 1 |
| 99416 | Prolonged clinical staff service (the service beyond the typical service time) during an evaluation and management service in the office or outpatient setting, direct patient contact with physician supervision; each additional 30 minutes (List separately in addition to code for prolonged service)                                                                                                                                 | 1 |
| 99420 | Administration and interpretation of health risk assessment                                                                                                                                                                                                                                                                                                                                                                               | 1 |
| 99429 | Other Preventive Medicine Services                                                                                                                                                                                                                                                                                                                                                                                                        | 1 |
| 99441 | Telephone evaluation and management service by a physician or other qualified health care professional who may report evaluation and management services provided to an established patient, parent, or guardian not originating from a related E/M service provided within the previous 7 days nor leading to an E/M service or procedure within the next 24 hours or soonest available appointment; 5-10 minutes of medical discussion  | 1 |
| 99442 | Telephone evaluation and management service provided by a physician to an established patient, parent, or guardian not originating from a related E/M service provided within the previous 7 days nor leading to an E/M service or procedure within the next 24 hours or soonest available appointment                                                                                                                                    | 1 |
| 99443 | Telephone evaluation and management service by a physician or other qualified health care professional who may report evaluation and management services provided to an established patient, parent, or guardian not originating from a related E/M service provided within the previous 7 days nor leading to an E/M service or procedure within the next 24 hours or soonest available appointment; 21-30 minutes of medical discussion | 1 |
| 99444 | Online evaluation and management service provided by a physician or other qualified health care professional who may report evaluation and management services provided to an established patient or guardian, not originating from a related E/M service provided within the previous 7 days, using the Internet or similar electronic communications network                                                                            | 1 |
| 99484 | Behavioral Health Integration                                                                                                                                                                                                                                                                                                                                                                                                             | 0 |
| 99492 | 1ST PSYC COLLAB CARE MGMT                                                                                                                                                                                                                                                                                                                                                                                                                 | 0 |
| 99493 | SBSQ PSYC COLLAB CARE MGMT                                                                                                                                                                                                                                                                                                                                                                                                                | 0 |
| 99494 | 1ST/SBSQ PSYC COLLAB CARE                                                                                                                                                                                                                                                                                                                                                                                                                 | 0 |
| 0359T | Behavior identification assessment by the physician or other qualified healthcare professional (QHCP), face-to-face with patient and caregiver(s)                                                                                                                                                                                                                                                                                         | 1 |
| 0360T | Observational behavioral follow-up assessment, includes physician or other qualified health care professional direction with interpretation and report, administered by one technician; first 30 minutes of technician time, face-to-face with the patient                                                                                                                                                                                | 0 |

|       |                                                                                                                                                                                                                                                                                                                                                                                                                      |   |
|-------|----------------------------------------------------------------------------------------------------------------------------------------------------------------------------------------------------------------------------------------------------------------------------------------------------------------------------------------------------------------------------------------------------------------------|---|
| 0361T | Observational behavioral follow-up assessment, includes physician or other qualified health care professional direction with interpretation and report, administered by one technician; each additional 30 minutes of technician time, face-to-face with the patient (List separately in addition to code for primary service)                                                                                       | 0 |
| 0362T | Exposure behavioral follow-up assessment, includes physician or other qualified health care professional direction with interpretation and report, administered by physician or other qualified health care professional with the assistance of one or more technicians; first 30 minutes of technician(s) time, face-to-face with the patient                                                                       | 1 |
| 0363T | Exposure behavioral follow-up assessment, includes physician or other qualified health care professional direction with interpretation and report, administered by physician or other qualified health care professional with the assistance of one or more technicians; each additional 30 minutes of technician(s) time, face-to-face with the patient (List separately in addition to code for primary procedure) | 0 |
| 0364T | Adaptive behavior treatment by protocol, administered by technician, face-to-face with one patient; first 30 minutes of technician time                                                                                                                                                                                                                                                                              | 1 |
| 0365T | Adaptive behavior treatment by protocol, administered by technician, face-to-face with one patient; each additional 30 minutes of technician time (List separately in addition to code for primary procedure)                                                                                                                                                                                                        | 1 |
| 0366T | Group adaptive behavior treatment by protocol, administered by technician, face-to-face with two or more patients; first 30 minutes of technician time                                                                                                                                                                                                                                                               | 0 |
| 0367T | Group adaptive behavior treatment by protocol, administered by technician, face-to-face with two or more patients; each additional 30 minutes of technician time (List separately in addition to code for primary procedure)                                                                                                                                                                                         | 1 |
| 0368T | Adaptive behavior treatment with protocol modification administered by physician or other qualified health care professional with one patient; first 30 minutes of patient face-to-face time                                                                                                                                                                                                                         | 1 |
| 0369T | Adaptive behavior treatment with protocol modification administered by physician or other qualified health care professional with one patient; each additional 30 minutes of patient face-to-face time (List separately in addition to code for primary procedure)                                                                                                                                                   | 1 |
| 0370T | Family adaptive behavior treatment guidance                                                                                                                                                                                                                                                                                                                                                                          | 1 |
| 0371T | Multiple-family group adaptive behavior treatment guidance                                                                                                                                                                                                                                                                                                                                                           | 0 |
| 0372T | Adaptive behavior treatment social skills group, administered by physician or other qualified health care professional face-to-face with multiple patients                                                                                                                                                                                                                                                           | 0 |
| 0373T | Exposure adaptive behavior treatment with protocol modification requiring two or more technicians for severe maladaptive behavior(s); first 60 minutes of technicians' time, face-to-face with patient                                                                                                                                                                                                               | 1 |
| 0374T | Exposure adaptive behavior treatment with protocol modification requiring two or more technicians for severe maladaptive behavior(s); each additional 30 minutes of technicians' time face-to-face with patient (List separately in addition to code for primary procedure)                                                                                                                                          | 0 |
| 0503F | Postpartum care visit                                                                                                                                                                                                                                                                                                                                                                                                | 1 |
| 1181F | Neuropsychiatric symptoms assessed and results reviewed (DEM)                                                                                                                                                                                                                                                                                                                                                        | 1 |

|       |                                                                                                                                                                                                                                              |   |
|-------|----------------------------------------------------------------------------------------------------------------------------------------------------------------------------------------------------------------------------------------------|---|
| 1182F | Neuropsychiatric symptoms, one or more present (DEM)                                                                                                                                                                                         | 1 |
| 1183F | Neuropsychiatric symptoms, absent (DEM)                                                                                                                                                                                                      | 1 |
| 2014F | Mental status assessed (CAP) (EM)                                                                                                                                                                                                            | 1 |
| 3085F | Suicide risk assessed                                                                                                                                                                                                                        | 1 |
| 3088F | Major depressive disorder, mild (MDD)                                                                                                                                                                                                        | 1 |
| 3089F | Major depressive disorder, moderate (MDD)                                                                                                                                                                                                    | 1 |
| 3090F | Major depressive disorder, severe without psychotic features (MDD)                                                                                                                                                                           | 1 |
| 3091F | Major depressive disorder, severe with psychotic features (MDD)                                                                                                                                                                              | 1 |
| 3092F | Major depressive disorder, in remission (MDD)                                                                                                                                                                                                | 1 |
| 3700F | Psychiatric disorders or disturbances assessed (Prkns)                                                                                                                                                                                       | 0 |
| 3725F | Screening for depression performed (DEM)                                                                                                                                                                                                     | 1 |
| 4060F | Psychotherapy services provided                                                                                                                                                                                                              | 0 |
| 4063F | Antidepressant pharmacotherapy considered and not prescribed                                                                                                                                                                                 | 0 |
| 4064F | Antidepressant pharmacotherapy prescribe                                                                                                                                                                                                     | 0 |
| 4065F | Therapeutic, Preventive or Other Interventions                                                                                                                                                                                               | 0 |
| 4320F | Patient counseled regarding psychosocial and pharmacologic treatment options for alcohol dependence (SUD)                                                                                                                                    | 0 |
| G0129 | Occupational therapy services requiring the skills of a qualified occupational therapist, furnished as a component of a partial hospitalization treatment program, per session (45 minutes or more)                                          | 1 |
| G0176 | Activity therapy, such as music, dance, art or play therapies not for recreation, related to the care and treatment of patient's disabling mental health problems, per session (45 minutes or more)                                          | 0 |
| G0177 | Training and educational services related to the care and treatment of patient's disabling mental health problems per session (45 minutes or more)                                                                                           | 0 |
| G0344 | Initial Preventive Physical Examination; face-to-face visit, services limited to a new patient during the first 12 months of Medicare enrollment.                                                                                            | 1 |
| G0396 | Alcohol and/or substance (other than tobacco) abuse structured assessment (e.g., audit, dast), and brief intervention 15 to 30 minutes                                                                                                       | 1 |
| G0397 | Alcohol and/or substance (other than tobacco) abuse structured assessment (e.g., audit, dast), and intervention, greater than 30 minutes                                                                                                     | 1 |
| G0402 | Initial Preventive Physical Examination; face-to-face visit, services limited to a new patient during the first 12 months of Medicare enrollment.                                                                                            | 1 |
| G0409 | Social work and psychological services, directly relating to and/or furthering the patient's rehabilitation goals, each 15 minutes, face-to-face; individual (services provided by a corf-qualified social worker or psychologist in a corf) | 1 |
| G0410 | Group psychotherapy other than of a multiple-family group, in a partial hospitalization setting, approximately 45 to 50 minutes                                                                                                              | 0 |
| G0411 | Interactive group psychotherapy, in a partial hospitalization setting, approximately 45 to 50 minutes                                                                                                                                        | 0 |
| G0442 | Annual alcohol misuse screening, 15 minutes                                                                                                                                                                                                  | 1 |

|       |                                                                                                                                                                                                                                                                                                                                                                                                                                                                                                                                                                                                                                                                                                                                                                                                                                                                                                                                                                                                                                                                                           |   |
|-------|-------------------------------------------------------------------------------------------------------------------------------------------------------------------------------------------------------------------------------------------------------------------------------------------------------------------------------------------------------------------------------------------------------------------------------------------------------------------------------------------------------------------------------------------------------------------------------------------------------------------------------------------------------------------------------------------------------------------------------------------------------------------------------------------------------------------------------------------------------------------------------------------------------------------------------------------------------------------------------------------------------------------------------------------------------------------------------------------|---|
| G0443 | Brief face-to-face behavioral counseling for alcohol misuse, 15 minutes                                                                                                                                                                                                                                                                                                                                                                                                                                                                                                                                                                                                                                                                                                                                                                                                                                                                                                                                                                                                                   | 0 |
| G0444 | Annual depression screening, 15 minutes                                                                                                                                                                                                                                                                                                                                                                                                                                                                                                                                                                                                                                                                                                                                                                                                                                                                                                                                                                                                                                                   | 1 |
| G0463 | Hospital outpatient clinic visit for assessment and management of a patient                                                                                                                                                                                                                                                                                                                                                                                                                                                                                                                                                                                                                                                                                                                                                                                                                                                                                                                                                                                                               | 1 |
| G0469 | Federally qualified health center (fqhc) visit, mental health, new patient; a medically-necessary, face-to-face mental health encounter (one-on-one) between a new patient and a fqhc practitioner during which time one or more fqhc services are rendered and includes a typical bundle of medicare-covered services that would be furnished per diem to a patient receiving a mental health visit                                                                                                                                                                                                                                                                                                                                                                                                                                                                                                                                                                                                                                                                                      | 0 |
| G0470 | Federally qualified health center (FQHC) visit, mental health, established patient; a medically-necessary, face-to-face mental health encounter (one-on-one) between an established patient and a FQHC practitioner during which time one or more FQHC services are rendered and includes a typical bundle of medicare-covered services that would be furnished per diem to a patient receiving a mental health visit                                                                                                                                                                                                                                                                                                                                                                                                                                                                                                                                                                                                                                                                     | 0 |
| G0502 | Initial psychiatric collaborative care management, first 70 minutes in the first calendar month of behavioral health care manager activities, in consultation with a psychiatric consultant, and directed by the treating physician or other qualified health care professional, with the following required elements: outreach to and engagement in treatment of a patient directed by the treating physician or other qualified health care professional; initial assessment of the patient, including administration of validated rating scales, with the development of an individualized treatment plan; review by the psychiatric consultant with modifications of the plan if recommended; entering patient in a registry and tracking patient follow-up and progress using the registry, with appropriate documentation, and participation in weekly caseload consultation with the psychiatric consultant; and provision of brief interventions using evidence-based techniques such as behavioral activation, motivational interviewing, and other focused treatment strategies | 0 |
| G0503 | Subsequent psychiatric collaborative care                                                                                                                                                                                                                                                                                                                                                                                                                                                                                                                                                                                                                                                                                                                                                                                                                                                                                                                                                                                                                                                 | 0 |
| G0504 | Initial or subsequent psychiatric collaborative care management, each additional 30 minutes in a calendar month of behavioral health care manager activities, in consultation with a psychiatric consultant, and directed by the treating physician or other qualified health care professional                                                                                                                                                                                                                                                                                                                                                                                                                                                                                                                                                                                                                                                                                                                                                                                           | 0 |
| G0507 | Care management services for behavioral health conditions, at least 20 minutes of clinical staff time, directed by a physician or other qualified health care professional, per calendar month, with the following required elements: initial assessment or follow-up monitoring, including the use of applicable validated rating scales; behavioral health care planning in relation to behavioral/psychiatric health problems, including revision for patients who are not progressing or whose status changes; facilitating and coordinating treatment such as psychotherapy, pharmacotherapy, counseling and/or psychiatric consultation; and continuity of care with a designated member of the care team                                                                                                                                                                                                                                                                                                                                                                           | 0 |
| G0512 | Psychiatric collaborative care model                                                                                                                                                                                                                                                                                                                                                                                                                                                                                                                                                                                                                                                                                                                                                                                                                                                                                                                                                                                                                                                      | 0 |
| G8704 | Ecg performed                                                                                                                                                                                                                                                                                                                                                                                                                                                                                                                                                                                                                                                                                                                                                                                                                                                                                                                                                                                                                                                                             | 1 |
| G8705 | Med reas no ecg                                                                                                                                                                                                                                                                                                                                                                                                                                                                                                                                                                                                                                                                                                                                                                                                                                                                                                                                                                                                                                                                           | 1 |

|       |                                                                                                                                                                                                      |   |
|-------|------------------------------------------------------------------------------------------------------------------------------------------------------------------------------------------------------|---|
| G8706 | Pt reas no ecg                                                                                                                                                                                       | 1 |
| G8707 | Ecg not performed                                                                                                                                                                                    | 1 |
| G8730 | PAIN ASSESS POS TOOL F/U PLAN DOC                                                                                                                                                                    | 1 |
| G8731 | Pain assessment using a standardized tool is documented as negative, no follow-up plan required                                                                                                      | 1 |
| G8732 | NO DOC PAIN ASMT REASON NOT GIVEN                                                                                                                                                                    | 1 |
| G8912 | Pt doc with wrong event                                                                                                                                                                              | 1 |
| G8913 | Pt doc no wrong event                                                                                                                                                                                | 1 |
| G8930 | Assessment of depression severity at the initial evaluation                                                                                                                                          | 1 |
| G8931 | Assessment of depression severity not documented, reason not given                                                                                                                                   | 1 |
| G8932 | Suicide risk assessed at the initial evaluation                                                                                                                                                      | 1 |
| G8933 | Suicide risk not assessed at the initial evaluation, reason not given                                                                                                                                | 1 |
| G8943 | Ldlc not pres w/i 12 mo prir                                                                                                                                                                         | 1 |
| G8947 | ONE OR MORE NEUROPSYCHIATRIC SYMP                                                                                                                                                                    | 1 |
| G8948 | NO NEUROPSYCHIATRIC SYMPTOMS                                                                                                                                                                         | 1 |
| G8954 | Complete and appropriate patient data were reported to a qualified clinical database registry                                                                                                        | 1 |
| G8959 | Clinician treating major depressive disorder communicates to clinician treating comorbid condition                                                                                                   | 1 |
| G8960 | CLN TX MDD NOT C CLN CC RSN NOT GVN                                                                                                                                                                  | 1 |
| G9012 | Other specified case management service not elsewhere classified                                                                                                                                     | 1 |
| G9193 | Clinician documented that patient with a diagnosis of major depression was not an eligible candidate for antidepressant medication treatment or patient did not have a diagnosis of major depression | 1 |
| G9194 | Mdd pt treated for 180d                                                                                                                                                                              | 1 |
| G9195 | Mdd pt not treated for 180d                                                                                                                                                                          | 1 |
| G9203 | RNA TST HC DOC 12 MO PRI INIT AV TX                                                                                                                                                                  | 1 |
| G9204 | RNA TST HC NOT DOC 12 MO PRI INT AV                                                                                                                                                                  | 1 |
| G9212 | DSM-IVTM CRITERIA MDD DOC INIT EVAL                                                                                                                                                                  | 1 |
| G9213 | DSM-IVTM CRIT MDD NOT DOC INIT EVAL                                                                                                                                                                  | 1 |
| G9227 | Functional outcome assessment using a standardized tool not documented, reason not given                                                                                                             | 1 |
| H0001 | Alcohol and/or drug assessment                                                                                                                                                                       | 1 |
| H0002 | Behavioral health screening to determine eligibility for admission to treatment program                                                                                                              | 0 |
| H0004 | Behavioral health counseling and therapy, per 15 minutes                                                                                                                                             | 0 |
| H0005 | Alcohol and/or drug services; group counseling by a clinician                                                                                                                                        | 0 |
| H0006 | Alcohol and/or drug services; case management                                                                                                                                                        | 0 |
| H0007 | Alcohol and/or drug services; crisis intervention (outpatient)                                                                                                                                       | 0 |
| H0008 | Alcohol and/or drug services; sub-acute detoxification (hospital inpatient)                                                                                                                          | 0 |
| H0010 | Alcohol and/or drug services; sub-acute detoxification (residential addiction program inpatient)                                                                                                     | 0 |

|       |                                                                                                                                                                                                                                                                                 |   |
|-------|---------------------------------------------------------------------------------------------------------------------------------------------------------------------------------------------------------------------------------------------------------------------------------|---|
| H0011 | Alcohol and/or drug services; acute detoxification (residential addiction program inpatient)                                                                                                                                                                                    | 0 |
| H0012 | Alcohol and/or drug services; sub-acute detoxification (residential addiction program outpatient)                                                                                                                                                                               | 0 |
| H0013 | Alcohol and/or drug services; acute detoxification (residential addiction program outpatient)                                                                                                                                                                                   | 0 |
| H0014 | Alcohol and/or drug services; ambulatory detoxification                                                                                                                                                                                                                         | 0 |
| H0015 | Alcohol and/or drug services; intensive outpatient (treatment program that operates at least 3 hours/day and at least 3 days/week and is based on an individualized treatment plan), including assessment, counseling; crisis intervention, and activity therapies or education | 0 |
| H0016 | Alcohol and/or drug services; medical/somatic (medical intervention in ambulatory setting)                                                                                                                                                                                      | 0 |
| H0017 | Behavioral health; residential (hospital residential treatment program), without room and board, per diem                                                                                                                                                                       | 0 |
| H0018 | Behavioral health; short-term residential (non-hospital residential treatment program), without room and board, per diem                                                                                                                                                        | 0 |
| H0019 | Behavioral health; long-term residential (non-medical, non-acute care in a residential treatment program where stay is typically longer than 30 days), without room and board, per diem                                                                                         | 0 |
| H0020 | Alcohol and/or drug services; methadone administration and/or service (provision of the drug by a licensed program)                                                                                                                                                             | 0 |
| H0021 | ALCOHOL &OR DRUG TRAINING SERVICE                                                                                                                                                                                                                                               | 0 |
| H0022 | Alcohol and/or drug intervention service (planned facilitation)                                                                                                                                                                                                                 | 0 |
| H0023 | Behavioral health outreach service (planned approach to reach a targeted population)                                                                                                                                                                                            | 0 |
| H0024 | Behavioral health prevention information dissemination service (one-way direct or non-direct contact with service audiences to affect knowledge and attitude)                                                                                                                   | 0 |
| H0025 | Behavioral health prevention education service (delivery of services with target population to affect knowledge, attitude and/or behavior)                                                                                                                                      | 0 |
| H0026 | Alcohol and/or drug prevention process service, community-based (delivery of services to develop skills of impactors)                                                                                                                                                           | 0 |
| H0028 | ALCOHL&RX PREV PROB ID&REF SRVC                                                                                                                                                                                                                                                 | 0 |
| H0029 | ALCOHL &OR RX PREVENTION ALT SRVC                                                                                                                                                                                                                                               | 0 |
| H0030 | Behavioral health hotline service                                                                                                                                                                                                                                               | 0 |
| H0031 | Mental health assessment, by non-physician                                                                                                                                                                                                                                      | 1 |
| H0032 | Mental health service plan development by non-physician                                                                                                                                                                                                                         | 0 |
| H0033 | ORAL MEDADMIN DIR OBSERVATION                                                                                                                                                                                                                                                   | 1 |
| H0035 |                                                                                                                                                                                                                                                                                 | 0 |
| H0036 | Community psychiatric supportive treatment, face-to-face, per 15 minutes                                                                                                                                                                                                        | 0 |
| H0037 | Community psychiatric supportive treatment program, per diem                                                                                                                                                                                                                    | 0 |
| H0038 | Self-help/peer services, per 15 minutes                                                                                                                                                                                                                                         | 1 |

|       |                                                                                             |   |
|-------|---------------------------------------------------------------------------------------------|---|
| H0039 | Assertive community treatment, face-to-face, per 15 minutes                                 | 0 |
| H0040 | Assertive community treatment program, per diem                                             | 0 |
| H0046 | Mental health services, not otherwise specified                                             | 0 |
| H0047 | Alcohol and/or other drug abuse services, not otherwise specified                           | 0 |
| H0048 | Alcohol and/or other drug testing: collection and handling only, specimens other than blood | 1 |
| H0049 | Alcohol and/or drug screening                                                               | 1 |
| H0050 | Alcohol and/or drug services, brief intervention, per 15 minutes                            | 0 |
| H2000 | Comprehensive multidisciplinary evaluation                                                  | 1 |
| H2001 | Rehabilitation program, per 1/2 day                                                         | 0 |
| H2010 | Comprehensive medication services, per 15 minutes                                           | 1 |
| H2011 | Crisis intervention service, per 15 minutes                                                 | 0 |
| H2012 | Behavioral health day treatment, per hour                                                   | 0 |
| H2013 | Psychiatric health facility service, per diem                                               | 0 |
| H2014 | SKILLS TRAINING&DVLP PER 15 MINUTES                                                         | 1 |
| H2015 | Comprehensive community support services, per 15 minutes                                    | 0 |
| H2016 | Comprehensive community support services, per diem                                          | 0 |
| H2017 | Psychosocial rehabilitation services, per 15 minutes                                        | 0 |
| H2018 | Psychosocial rehabilitation services, per diem                                              | 0 |
| H2019 | Therapeutic behavioral services, per 15 minutes                                             | 0 |
| H2020 | Therapeutic behavioral services, per diem                                                   | 0 |
| H2021 | Community-based wrap-around services, per 15 minutes                                        | 1 |
| H2022 | Community-based wrap-around services, per diem                                              | 1 |
| H2027 | Psychoeducational service, per 15 minutes                                                   | 1 |
| H2028 | Sexual offender treatment service, per 15 minutes                                           | 1 |
| H2029 | Sexual offender treatment service, per diem                                                 | 1 |
| H2030 | Mental health clubhouse services, per 15 minutes                                            | 1 |
| H2031 | Mental health clubhouse services, per diem                                                  | 0 |
| H2032 | ACTIVITY THERAPY PER 15 MINUTES                                                             | 1 |
| H2033 | MULTISYS THERAPY JUVS PER 15 MIN                                                            | 1 |
| H2034 | Alcohol and/or drug abuse halfway house services, per diem                                  | 0 |
| H2035 | Alcohol and/or other drug treatment program, per hour                                       | 0 |
| H2036 | Alcohol and/or other drug treatment program, per diem                                       | 0 |
| J0400 | Injection, aripiprazole, intramuscular, 0.25 mg                                             | 0 |
| J0401 | Injection, aripiprazole, extended release, 1 mg                                             | 0 |
| J130  | #N/A                                                                                        | 0 |
| J1630 | Injection, haloperidol, up to 5 mg                                                          | 1 |
| J1631 | Injection, haloperidol decanoate, per 50 mg                                                 | 1 |
| J1942 | Injection, aripiprazole lauroxil, 1 mg                                                      | 0 |
| J2358 | Injection, olanzapine, long-acting, 1 mg                                                    | 0 |
| J2426 | Injection, paliperidone palmitate extended release, 1 mg                                    | 0 |

|       |                                                                                                                                                                     |   |
|-------|---------------------------------------------------------------------------------------------------------------------------------------------------------------------|---|
| J2680 | Injection, fluphenazine decanoate, up to 25 mg                                                                                                                      | 0 |
| J2794 | Injection, risperidone (risperdal consta), 0.5 mg                                                                                                                   | 0 |
| M0064 | Brief office visit for the sole purpose of monitoring or changing drug prescriptions used in the treatment of mental psychoneurotic and personality disorders       | 0 |
| Q3014 | Telehealth originating site facility fee                                                                                                                            | 1 |
| S3005 | Performance measurement, evaluation of patient self assessment, depression                                                                                          | 1 |
| S9445 | Patient education, not otherwise classified, non-physician provider, individual, per session                                                                        | 1 |
| S9446 | Patient education, not otherwise classified, non-physician provider, group, per session                                                                             | 1 |
| S9454 | Stress management classes, non-physician provider, per session                                                                                                      | 1 |
| S9475 | Ambulatory setting substance abuse treatment or detoxification services, per diem                                                                                   | 0 |
| S9480 | Intensive outpatient psychiatric services, per diem                                                                                                                 | 0 |
| S9481 |                                                                                                                                                                     | 0 |
| S9482 | Family stabilization services, per 15 minutes                                                                                                                       | 1 |
| S9483 |                                                                                                                                                                     | 0 |
| S9484 | Crisis intervention mental health services, per hour                                                                                                                | 0 |
| S9485 | Crisis intervention mental health services, per diem                                                                                                                | 0 |
| T1001 | Nursing assessment/evaluation                                                                                                                                       | 1 |
| T1006 | Alcohol and/or substance abuse services, family/couple counseling                                                                                                   | 0 |
| T1007 | Alcohol and/or substance abuse services, treatment plan development and/or modification                                                                             | 0 |
| T1008 | DAY TREATMENT FOR INDIVIDUAL ALCOHOL AND/OR SUBSTANCE ABUSE SERVICES                                                                                                | 0 |
| T1011 | ALCOHOL AND/OR SUBSTANCE ABUSE SERVICES, NOT OTHERWISE CLASSIFIED                                                                                                   | 0 |
| T1012 | Alcohol and/or substance abuse services, skills development                                                                                                         | 0 |
| T1023 | Screening to determine the appropriateness of consideration of an individual for participation in a specified program, project or treatment protocol, per encounter | 1 |
| T1040 | Medicaid certified community behavioral health clinic services, per diem                                                                                            | 0 |
| T1041 | Medicaid certified community behavioral health clinic services, per month                                                                                           | 0 |
| T2048 | BHVAL HLTH; LTC RES W/ROOM&BD-DIEM                                                                                                                                  | 0 |



## **Behavioral Health Provider Taxonomies**

| X12Code    | VACode  | GROUPING                                                   | CLASSIFICATION                             | SPECIALIZATION                                  | Category                                      |
|------------|---------|------------------------------------------------------------|--------------------------------------------|-------------------------------------------------|-----------------------------------------------|
| 363LP0808X | V100616 | Physician Assistants & Advanced Practice Nursing Providers | Nurse Practitioner                         | Psychiatric/Mental Health                       | Behavioral Health Advanced Practice Providers |
| 3645P0807X | V100326 | Physician Assistants & Advanced Practice Nursing Providers | Clinical Nurse Specialist                  | Psychiatric/Mental Health, Child & Adolescent   | Behavioral Health Advanced Practice Providers |
| 3645P0808X | V100324 | Physician Assistants & Advanced Practice Nursing Providers | Clinical Nurse Specialist                  | Psychiatric/Mental Health                       | Behavioral Health Advanced Practice Providers |
| 3645P0809X | V100325 | Physician Assistants & Advanced Practice Nursing Providers | Clinical Nurse Specialist                  | Psychiatric/Mental Health, Adult                | Behavioral Health Advanced Practice Providers |
| 3645P0810X | V100327 | Physician Assistants & Advanced Practice Nursing Providers | Clinical Nurse Specialist                  | Psychiatric/Mental Health, Child & Family       | Behavioral Health Advanced Practice Providers |
| 3645P0811X | V100328 | Physician Assistants & Advanced Practice Nursing Providers | Clinical Nurse Specialist                  | Psychiatric/Mental Health, Chronically Ill      | Behavioral Health Advanced Practice Providers |
| 3645P0812X | V100329 | Physician Assistants & Advanced Practice Nursing Providers | Clinical Nurse Specialist                  | Psychiatric/Mental Health, Community            | Behavioral Health Advanced Practice Providers |
| 3645P0813X | V100330 | Physician Assistants & Advanced Practice Nursing Providers | Clinical Nurse Specialist                  | Psychiatric/Mental Health, Geropsychiatric      | Behavioral Health Advanced Practice Providers |
| 101Y00000X | V010200 | Behavioral Health & Social Service Providers               | Counselor                                  |                                                 | Behavioral Health Counseling and Therapy      |
| 101YA0400X | V010201 | Behavioral Health & Social Service Providers               | Counselor                                  | Addiction (Substance Use Disorder)              | Behavioral Health Counseling and Therapy      |
| 101YM0800X | V010203 | Behavioral Health & Social Service Providers               | Counselor                                  | Mental Health                                   | Behavioral Health Counseling and Therapy      |
| 101YP1600X | V010204 | Behavioral Health & Social Service Providers               | Counselor                                  | Pastoral                                        | Behavioral Health Counseling and Therapy      |
| 101YP2500X | V010205 | Behavioral Health & Social Service Providers               | Counselor                                  | Professional                                    | Behavioral Health Counseling and Therapy      |
| 101YS0200X | V010206 | Behavioral Health & Social Service Providers               | Counselor                                  | School                                          | Behavioral Health Counseling and Therapy      |
| 102L00000X | V010423 | Behavioral Health & Social Service Providers               | Psychoanalyst                              |                                                 | Behavioral Health Counseling and Therapy      |
| 103K00000X | V010700 | Behavioral Health & Social Service Providers               | Behavior Analyst                           |                                                 | Behavioral Health Counseling and Therapy      |
| 103S00000X | V010300 | Behavioral Health & Social Service Providers               | Psychoanalyst                              |                                                 | Behavioral Health Counseling and Therapy      |
| 103SA1400N | V010302 | Behavioral Health & Social Service Providers               | Psychoanalyst                              | Associate                                       | Behavioral Health Counseling and Therapy      |
| 103SA1800N | V010301 | Behavioral Health & Social Service Providers               | Psychoanalyst                              | Affiliate                                       | Behavioral Health Counseling and Therapy      |
| 106H00000X | V010202 | Behavioral Health & Social Service Providers               | Marriage & Family Therapist                |                                                 | Behavioral Health Counseling and Therapy      |
| 104100000X | V010600 | Behavioral Health & Social Service Providers               | Social Worker                              |                                                 | Behavioral Health Social Work                 |
| 1041C0700X | V010100 | Behavioral Health & Social Service Providers               | Social Worker                              | Clinical                                        | Behavioral Health Social Work                 |
| 1041C0700X | V010401 | Behavioral Health & Social Service Providers               | Social Worker                              | Clinical                                        | Behavioral Health Social Work                 |
| 1041S0200X | V010500 | Behavioral Health & Social Service Providers               | Social Worker                              | School                                          | Behavioral Health Social Work                 |
| 102X00000X | V010701 | Behavioral Health & Social Service Providers               | Poetry Therapist                           |                                                 | Other                                         |
| 103GC0700X | V010402 | Behavioral Health & Social Service Providers               | Clinical Neuropsychologist                 | Clinical                                        | Other                                         |
| 103GC0700X | V010402 | Behavioral Health & Social Service Providers               | Clinical Neuropsychologist                 | Clinical                                        | Other                                         |
| 106E00000X | V010702 | Behavioral Health & Social Service Providers               | Assistant Behavior Analyst                 |                                                 | Other                                         |
| 106S00000X | V010703 | Behavioral Health & Social Service Providers               | Behavior Technician                        |                                                 | Other                                         |
| 207QA0401X | V180701 | Allopathic & Osteopathic Physicians                        | Family Medicine                            | Addiction Medicine                              | Other                                         |
| 207RA0401X | V181001 | Allopathic & Osteopathic Physicians                        | Internal Medicine                          | Addiction Medicine                              | Other                                         |
| 273R00000X |         | Hospital Units                                             | Psychiatric Unit                           |                                                 | Other                                         |
| 283Q00000X |         | Hospitals                                                  | Psychiatric Hospital                       |                                                 | Other                                         |
| 323P00000X |         | Residential Treatment Facilities                           | Psychiatric Residential Treatment Facility |                                                 | Other                                         |
| 103G00000X | V010420 | Behavioral Health & Social Service Providers               | Clinical Neuropsychologist                 |                                                 | Other                                         |
| 1835P1300X | V090105 | Pharmacy Service Providers                                 | Pharmacist                                 | Psychiatric                                     | Pharmacist                                    |
| 2084A0401X | V182901 | Allopathic & Osteopathic Physicians                        | Psychiatry & Neurology                     | Addiction Medicine                              | Psychiatry and Behavioral Neurology           |
| 2084B0040X | V182914 | Allopathic & Osteopathic Physicians                        | Psychiatry & Neurology                     | Behavioral Neurology & Neuropsychiatry          | Psychiatry and Behavioral Neurology           |
| 2084B0040X | V182916 | Allopathic & Osteopathic Physicians                        | Psychiatry & Neurology                     | Behavioral Neurology & Neuropsychiatry          | Psychiatry and Behavioral Neurology           |
| 2084F0202X | V182905 | Allopathic & Osteopathic Physicians                        | Psychiatry & Neurology                     | Forensic Psychiatry                             | Psychiatry and Behavioral Neurology           |
| 2084P0015X | V182920 | Allopathic & Osteopathic Physicians                        | Psychiatry & Neurology                     | Psychosomatic Medicine                          | Psychiatry and Behavioral Neurology           |
| 2084P0800X | V182911 | Allopathic & Osteopathic Physicians                        | Psychiatry & Neurology                     | Psychiatry                                      | Psychiatry and Behavioral Neurology           |
| 2084P0802X | V182902 | Allopathic & Osteopathic Physicians                        | Psychiatry & Neurology                     | Addiction Psychiatry                            | Psychiatry and Behavioral Neurology           |
| 2084P0804X | V182903 | Allopathic & Osteopathic Physicians                        | Psychiatry & Neurology                     | Child & Adolescent Psychiatry                   | Psychiatry and Behavioral Neurology           |
| 2084P0805X | V182906 | Allopathic & Osteopathic Physicians                        | Psychiatry & Neurology                     | Geriatric Psychiatry                            | Psychiatry and Behavioral Neurology           |
| 2084S0012X | V182921 | Allopathic & Osteopathic Physicians                        | Psychiatry & Neurology                     | Sleep Medicine                                  | Psychiatry and Behavioral Neurology           |
| 103T00000X | V010400 | Behavioral Health & Social Service Providers               | Psychologist                               |                                                 | Psychologist                                  |
| 103TA0400X | V010409 | Behavioral Health & Social Service Providers               | Psychologist                               | Addiction (Substance Use Disorder)              | Psychology                                    |
| 103TA0700X | V010410 | Behavioral Health & Social Service Providers               | Psychologist                               | Adult Development & Aging                       | Psychology                                    |
| 103TB0200X | V010401 | Behavioral Health & Social Service Providers               | Psychologist                               | Cognitive & Behavioral                          | Psychology                                    |
| 103TC0700X | V010403 | Behavioral Health & Social Service Providers               | Psychologist                               | Clinical                                        | Psychology                                    |
| 103TC1900X | V010404 | Behavioral Health & Social Service Providers               | Psychologist                               | Counseling                                      | Psychology                                    |
| 103TC2200X | V010411 | Behavioral Health & Social Service Providers               | Psychologist                               | Clinical Child & Adolescent                     | Psychology                                    |
| 103TE1000X | V010412 | Behavioral Health & Social Service Providers               | Psychologist                               | Educational                                     | Psychology                                    |
| 103TE1100X | V010413 | Behavioral Health & Social Service Providers               | Psychologist                               | Exercise & Sports                               | Psychology                                    |
| 103TF0000X | V010405 | Behavioral Health & Social Service Providers               | Psychologist                               | Family                                          | Psychology                                    |
| 103TF0200X | V010406 | Behavioral Health & Social Service Providers               | Psychologist                               | Forensic                                        | Psychology                                    |
| 103TH0004X | V010422 | Behavioral Health & Social Service Providers               | Psychologist                               | Health                                          | Psychology                                    |
| 103TH0100X | V010407 | Behavioral Health & Social Service Providers               | Psychologist                               | Health Service                                  | Psychology                                    |
| 103TM1700X | V010414 | Behavioral Health & Social Service Providers               | Psychologist                               | Men & Masculinity                               | Psychology                                    |
| 103TM1800X | V010415 | Behavioral Health & Social Service Providers               | Psychologist                               | Mental Retardation & Developmental Disabilities | Psychology                                    |
| 103TP0016X | V183403 | Behavioral Health & Social Service Providers               | Psychologist                               | Prescribing (Medical)                           | Psychology                                    |
| 103TP0814X | V010421 | Behavioral Health & Social Service Providers               | Psychologist                               | Psychoanalysis                                  | Psychology                                    |
| 103TP2700X | V010416 | Behavioral Health & Social Service Providers               | Psychologist                               | Psychotherapy                                   | Psychology                                    |
| 103TP2701X | V010417 | Behavioral Health & Social Service Providers               | Psychologist                               | Group Psychotherapy                             | Psychology                                    |
| 103TR0400X | V010418 | Behavioral Health & Social Service Providers               | Psychologist                               | Rehabilitation                                  | Psychology                                    |
| 103TS0200X | V010408 | Behavioral Health & Social Service Providers               | Psychologist                               | School                                          | Psychology                                    |
| 103TW0100X | V010419 | Behavioral Health & Social Service Providers               | Psychologist                               | Women                                           | Psychology                                    |

**Site of Behavioral Health Care, Inclusions and Exclusions**

| Community Care Place of Service (POS) Inclusions                                                                                                                                                                                                                                                                                                                                                                    | Visit Type & VA Stop Code Exclusions                                                                                                                                                                                                                                                                                                                                                                                                                                                                                                                                                                                                                                                                                                                     |
|---------------------------------------------------------------------------------------------------------------------------------------------------------------------------------------------------------------------------------------------------------------------------------------------------------------------------------------------------------------------------------------------------------------------|----------------------------------------------------------------------------------------------------------------------------------------------------------------------------------------------------------------------------------------------------------------------------------------------------------------------------------------------------------------------------------------------------------------------------------------------------------------------------------------------------------------------------------------------------------------------------------------------------------------------------------------------------------------------------------------------------------------------------------------------------------|
|                                                                                                                                                                                                                                                                                                                                                                                                                     | <p>Laboratory</p> <p>Because we did not include POS 81, we excluded this VA stop code:<br/>108, Laboratory</p>                                                                                                                                                                                                                                                                                                                                                                                                                                                                                                                                                                                                                                           |
| 23 (Emergency Room – Hospital)                                                                                                                                                                                                                                                                                                                                                                                      | Service during Emergency Room Visit                                                                                                                                                                                                                                                                                                                                                                                                                                                                                                                                                                                                                                                                                                                      |
| <p>55 (Residential Substance Abuse Treatment Facility)<br/>56 (Psychiatric Residential Treatment Center)</p>                                                                                                                                                                                                                                                                                                        | <p>Service during Residential Facility Stay for Psychiatric or Substance Abuse</p> <p>Some care from non-VA providers is included in VA outpatient files. So that we would not double count it through including these stop codes and community care claims data, we excluded the following VA stop codes:<br/>651, State Nursing Home Days<br/>652, State Res Rehab Tx Prgm (RRTP)<br/>653, State Hospital Care<br/>656, DoD Non-VA Care<br/>669, Community Care Consult<br/>681, VA-Paid HCBC Providers<br/>682, VA-Refer to HCPC Providers</p> <p>Because we did not include equivalent POS for community care, we excluded the following VA stop codes:<br/>119, Community Nursing Home Follow-Up<br/>351, Hospice Care<br/>353, Palliative Care</p> |
| 12 (Home)                                                                                                                                                                                                                                                                                                                                                                                                           | <p>Home</p> <p>Some care from non-VA providers is included in VA outpatient files. So that we would not double count it through including these stop codes and community care claims data, we excluded the following VA stop codes:<br/>658, State Home Adult Day Hlthcare<br/>121, Community Residential Care</p> <p>Because we did not include equivalent POS for community care, we excluded the following VA stop codes:<br/>190, Adult Day Health Care<br/>191, Community ADHC Followup</p>                                                                                                                                                                                                                                                         |
| <p>2 (Telehealth)<br/>3 (School)<br/>4 (Homeless Shelter)<br/>5 (Indian Health Service Free-standing Facility)<br/>6 (Indian Health Service Provider-based Facility)<br/>7 (Tribal 638 Free-standing Facility)<br/>8 (Tribal 638 Provider-based Facility)<br/>9 (Prison/Correctional Facility)<br/>11 (Office)<br/>15 (Mobile Unit)<br/>17 (Walk-in Retail Health Clinic)<br/>18 (Place of Employment-Worksite)</p> | <p>Outpatient</p> <p>Because we did not include equivalent POS for community care, we excluded the following VA stop codes:<br/>602 (Assisted Hemodialysis)<br/>603 (Limited Self Care Hemodialysis)<br/>604 Home/Self Hemodialysis Training<br/>606 (Continuous Ambulatory Peritoneal Dialysis (CAPD))<br/>607 (Limited Self Care CAPD)<br/>608 (Home/Self CAPD trning)<br/>611 (Telephone/Dialysis)</p>                                                                                                                                                                                                                                                                                                                                                |

|                                                                                                                                                                                                                                                                                                                                                                                                                                                                                                                             |  |
|-----------------------------------------------------------------------------------------------------------------------------------------------------------------------------------------------------------------------------------------------------------------------------------------------------------------------------------------------------------------------------------------------------------------------------------------------------------------------------------------------------------------------------|--|
| 19 (Off Campus-Outpatient Hospital)<br>20 (Urgent Care Facility)<br>22 (On Campus-Outpatient Hospital)<br>24 (Ambulatory Surgical Center)<br>26 (Military Treatment Facility)<br>49 (Independent Clinic)<br>50 (Federally Qualified Health Center)<br>52 (Psychiatric Facility-Partial Hospitalization)<br>53 (Community Mental Health Center)<br>57 (Non-residential Substance Abuse Treatment Facility)<br>62 (Comprehensive Outpatient Rehabilitation Facility)<br>71 (Public Health Clinic)<br>72 (Rural Health Clinic) |  |
| 10 (Unassigned)<br>27 (Unassigned)<br>28 (Unassigned)<br>29 (Unassigned)<br>30 (Unassigned)<br>35 (Unassigned)<br>36 (Unassigned)<br>37 (Unassigned)<br>38 (Unassigned)<br>39 (Unassigned)<br>40 (Unassigned)<br>43 (Unassigned)<br>44 (Unassigned)<br>45 (Unassigned)<br>46 (Unassigned)<br>47 (Unassigned)<br>48 (Unassigned)<br>59 (Unassigned)<br>63 (Unassigned)<br>64 (Unassigned)<br>99 (Unknown)                                                                                                                    |  |

**Veterans Using Behavioral Health Inpatient Services in VA Only, Community Care Only, or Both VA and Community Care**

|              | FY16   |        | FY17   |        | FY18   |        | FY19   |        | Any Years |        |
|--------------|--------|--------|--------|--------|--------|--------|--------|--------|-----------|--------|
|              | N      | %      | N      | %      | N      | %      | N      | %      | N         | %      |
| <b>VA</b>    | 55,040 | 76.34% | 54,258 | 75.79% | 53,395 | 75.26% | 53,841 | 77.45% | 148,284   | 72.65% |
| <b>CC</b>    | 11,771 | 16.33% | 11,612 | 16.22% | 11,740 | 16.55% | 10,221 | 14.7%  | 30,586    | 14.99% |
| <b>Both</b>  | 5,286  | 7.33%  | 5,716  | 7.98%  | 5,814  | 8.19%  | 5,454  | 7.85%  | 25,224    | 12.36% |
| <b>Total</b> | 72,097 | 100.0% | 71,586 | 100.0% | 70,949 | 100.0% | 69,516 | 100.0% | 204,094   | 100.0% |

**Veterans Using Behavioral Health Outpatient Services in VA Only, Community Care Only, or Both VA and Community Care**

|              | FY16      |        | FY17      |        | FY18      |        | FY19      |        | Any Years |        |
|--------------|-----------|--------|-----------|--------|-----------|--------|-----------|--------|-----------|--------|
|              | N         | %      | N         | %      | N         | %      | N         | %      | N         | %      |
| <b>VA</b>    | 1,803,076 | 98.52% | 1,831,489 | 97.65% | 1,873,628 | 97.38% | 1,941,373 | 96.72% | 3,335,426 | 96.20% |
| <b>CC</b>    | 9,294     | 0.51%  | 15,083    | 0.80%  | 15,513    | 0.81%  | 19,398    | 0.97%  | 19,209    | 0.55%  |
| <b>Both</b>  | 17,815    | 0.97%  | 29,036    | 1.55%  | 34,974    | 1.82%  | 46,539    | 2.32%  | 112,375   | 3.24%  |
| <b>Total</b> | 1,830,185 | 100.0% | 1,875,608 | 100.0% | 1,924,115 | 100.0% | 2,007,310 | 100.0% | 3,467,010 | 100.0% |

**VA and Community Care Inpatient Stays by Behavioral Health Condition Group, Fiscal Years 2016-2019**

|                               | VA stays<br>N (%)<br>N =<br>360,148 | CC stays<br>N (%)<br>N = 88,500 | Standardized<br>mean<br>difference | P-value |
|-------------------------------|-------------------------------------|---------------------------------|------------------------------------|---------|
| Serious mental illness        | 110,480<br>(30.68%)                 | 25,343<br>(28.64%)              | 0.26                               | <.001   |
| SUD                           | 130,798<br>(36.32%)                 | 29,014<br>(32.78%)              |                                    |         |
| PTSD                          | 24,534<br>(6.81%)                   | 4,401<br>(4.97%)                |                                    |         |
| Personality Disorders         | 4,180<br>(1.16%)                    | 193<br>(0.22%)                  |                                    |         |
| Mood Disorders                | 79,012<br>(21.94%)                  | 27,457<br>(31.02%)              |                                    |         |
| Anxiety Disorders             | 5,298<br>(1.47%)                    | 678<br>(0.77%)                  |                                    |         |
| Other Mental Health Disorders | 5,846<br>(1.62%)                    | 1,414<br>(1.6%)                 |                                    |         |

**VA and Community Care Outpatient Visits by Behavioral Health Condition Group, Fiscal Years 2016-2019**

|                                      | <b>VA visits<br/>N (%)</b><br>N=53,346,731 | <b>CC visits<br/>N (%)</b><br>N=1,696,876 | <b>Standardized<br/>mean<br/>difference</b> | <b>P-value</b> |
|--------------------------------------|--------------------------------------------|-------------------------------------------|---------------------------------------------|----------------|
| Serious mental illness               | 6,311,879<br>(11.83%)                      | 100,766<br>(5.94%)                        | 0.62                                        | <.001          |
| SUD                                  | 9,871,299<br>(18.5%)                       | 365,155<br>(21.52%)                       |                                             |                |
| PTSD                                 | 14,539,814<br>(27.26%)                     | 664,823<br>(39.18%)                       |                                             |                |
| Personality Disorders                | 291,741<br>(0.55%)                         | 8,717<br>(0.51%)                          |                                             |                |
| Mood Disorders                       | 8,251,069<br>(15.47%)                      | 349,763<br>(20.61%)                       |                                             |                |
| Anxiety Disorders                    | 2,034,618<br>(3.81%)                       | 97,181<br>(5.73%)                         |                                             |                |
| Other Mental Health Disorders        | 891,217<br>(1.67%)                         | 42,112<br>(2.48%)                         |                                             |                |
| Non-Mental Health Specific Diagnosis | 11,155,094<br>(20.91%)                     | 68,359<br>(4.03%)                         |                                             |                |

**Top 10 Current Procedural Terminology (CPT) Codes Provided in VA Outpatient Visits**

Grey highlighting indicates that they were also in the Top Ten for community care.

| <b>CPT</b> | <b>Description</b>                                                                                                                                                                                                                                                                                                                                                                                                                                                                                                                           | <b>% of VA<br/>codes</b> | <b>% of<br/>Community<br/>Care codes</b> |
|------------|----------------------------------------------------------------------------------------------------------------------------------------------------------------------------------------------------------------------------------------------------------------------------------------------------------------------------------------------------------------------------------------------------------------------------------------------------------------------------------------------------------------------------------------------|--------------------------|------------------------------------------|
| 90853      | Group Psychotherapy (Other Than of a Multiple-Family Group) – This code relies on the use of interactions of group members to examine the pathology of each individual within the group. In addition, the dynamics of the entire group are noted and used to modify behaviors and attitudes of the patient members. The size of the group may vary depending on the therapeutic goals of the group and/or the type of therapeutic interactions used by the therapist. The code is used to report per-session services for each group member. | 13.7%                    | 2.6%                                     |
| 90837      | Individual Psychotherapy, 60 minutes with patient and/or family member                                                                                                                                                                                                                                                                                                                                                                                                                                                                       | 9.1%                     | 47.2%                                    |
| 90833      | Psychotherapy, 30 minutes with patient when performed with an evaluation and management service (List separately in addition to the code for primary procedure)                                                                                                                                                                                                                                                                                                                                                                              | 7.6%                     | 1.2%                                     |
| 99214      | Office/outpatient visit est                                                                                                                                                                                                                                                                                                                                                                                                                                                                                                                  | 7.4%                     | 3.6%                                     |
| 99213      | Office/outpatient visit est                                                                                                                                                                                                                                                                                                                                                                                                                                                                                                                  | 6.3%                     | 2.5%                                     |

|                              |                                                                        |              |              |
|------------------------------|------------------------------------------------------------------------|--------------|--------------|
| 98966                        | Non-Face-to-Face Nonphysician Telephone Services                       | 6.0%         | 0.0%         |
| 90834                        | Individual Psychotherapy, 45 minutes with patient and/or family member | 6.0%         | 9.2%         |
| 90832                        | Psychotherapy, 30 minutes                                              | 5.0%         | 0.9%         |
| 98967                        | Non-Face-to-Face Nonphysician Telephone Services                       | 4.0%         | 0.0%         |
| 90791                        | Psych diagnostic evaluation                                            | 2.6%         | 4.3%         |
| <b>Portion of Total Care</b> |                                                                        | <b>67.7%</b> | <b>71.5%</b> |

**Top 10 Current Procedure Terminology/Healthcare Common Procedure Coding System (CPT/HCPCS) Codes Provided in Community Care Outpatient Visits**

Grey highlighting indicates that they were also in the Top Ten for VA.

| CPT/HCPCS                    | Description                                                                                                                                                                                                                                                                                                                                                                                                                                                                                                                                                                 | % of CC Total | % of VA Total |
|------------------------------|-----------------------------------------------------------------------------------------------------------------------------------------------------------------------------------------------------------------------------------------------------------------------------------------------------------------------------------------------------------------------------------------------------------------------------------------------------------------------------------------------------------------------------------------------------------------------------|---------------|---------------|
| 90837                        | Individual Psychotherapy, 60 minutes with patient and/or family member                                                                                                                                                                                                                                                                                                                                                                                                                                                                                                      | 47.2%         | 9.1%          |
| H0020                        | Alcohol and/or drug services; methadone administration and/or service (provision of the drug by a licensed program)                                                                                                                                                                                                                                                                                                                                                                                                                                                         | 15.3%         | 0.8%          |
| 90834                        | Individual Psychotherapy, 45 minutes with patient and/or family member                                                                                                                                                                                                                                                                                                                                                                                                                                                                                                      | 9.2%          | 6.0%          |
| 90791                        | Psych diagnostic evaluation                                                                                                                                                                                                                                                                                                                                                                                                                                                                                                                                                 | 4.3%          | 2.6%          |
| 99214                        | Office/outpatient visit est<br>Group Psychotherapy (Other Than of a Multiple-Family Group) – This code relies on the use of interactions of group members to examine the pathology of each individual within the group. In addition, the dynamics of the entire group are noted and used to modify behaviors and attitudes of the patient members. The size of the group may vary depending on the therapeutic goals of the group and/or the type of therapeutic interactions used by the therapist. The code is used to report per-session services for each group member. | 3.6%          | 7.4%          |
| 90853                        | Office/outpatient visit est                                                                                                                                                                                                                                                                                                                                                                                                                                                                                                                                                 | 2.6%          | 13.7%         |
| 99213                        | Office/outpatient visit est                                                                                                                                                                                                                                                                                                                                                                                                                                                                                                                                                 | 2.5%          | 6.3%          |
| 90847                        | Family Psychotherapy (Conjoint Psychotherapy) (With Patient Present) – This code is used when the therapy includes the patient and family members.                                                                                                                                                                                                                                                                                                                                                                                                                          | 1.5%          | 0.5%          |
| 90868                        | Therapeutic repetitive transcranial magnetic stimulation (TMS) treatment; subsequent delivery and management, per session                                                                                                                                                                                                                                                                                                                                                                                                                                                   | 1.3%          | 0.1%          |
| 90833                        | Psychotherapy, 30 minutes with patient when performed with an evaluation and management service (List separately in addition to the code for primary procedure)                                                                                                                                                                                                                                                                                                                                                                                                             | 1.2%          | 7.6%          |
| <b>Portion of Total Care</b> |                                                                                                                                                                                                                                                                                                                                                                                                                                                                                                                                                                             | <b>88.7%</b>  | <b>54.1%</b>  |

**Characteristics Predicting Behavioral Health Inpatient Stay in VA-Purchased Community Care**

|                       |                                                                             |                                                                                                      |
|-----------------------|-----------------------------------------------------------------------------|------------------------------------------------------------------------------------------------------|
| <b>Characteristic</b> | <b>CC stay</b><br>Logistic<br>Random effect:<br>VAMC, County<br>OR (95% CI) | <b>CC stay</b><br>Linear<br>Fixed Effect:<br>VAMC<br>w/ Clustered Standard Error<br>at Patient level |
|-----------------------|-----------------------------------------------------------------------------|------------------------------------------------------------------------------------------------------|

|                                                                                        |                             | Estimate (95% CI)               |
|----------------------------------------------------------------------------------------|-----------------------------|---------------------------------|
| <b>Medical Conditions</b>                                                              |                             |                                 |
| Behavioral Health Condition Group (ref=Other Mental Health Disorders)                  |                             |                                 |
| Serious mental illness                                                                 | 0.979 (0.909, 1.054)        | 0.0001 (-0.019, 0.010)          |
| SUD                                                                                    | 0.991 (0.920, 1.067)        | 0.0000 (-0.010, 0.010)          |
| PTSD                                                                                   | <b>0.6 (0.553, 0.652)</b>   | <b>-0.0531 (-0.065, -0.042)</b> |
| Personality Disorders                                                                  | <b>0.177 (0.148, 0.212)</b> | <b>-0.1167 (-0.130, -0.104)</b> |
| Mood Disorders                                                                         | <b>1.314 (1.220, 1.415)</b> | <b>0.0367 (0.027, 0.047)</b>    |
| Anxiety Disorders                                                                      | <b>0.478 (0.423, 0.539)</b> | <b>-0.0662 (-0.079, -0.053)</b> |
| Gagne Physical Health Score                                                            | <b>0.991 (0.987, 0.996)</b> | <b>-0.0016 (-0.002, -0.001)</b> |
| <b>Sociodemographic Characteristics</b>                                                |                             |                                 |
| Age (in years)                                                                         | <b>0.998 (0.997, 0.999)</b> | <b>-0.0002 (-0.006, 0.006)</b>  |
| Male (ref=Female)                                                                      | <b>0.777 (0.754, 0.800)</b> | <b>-0.0325 (-0.047, -0.018)</b> |
| Race (ref=White)                                                                       |                             |                                 |
| American Indian or Alaska Native                                                       | 1.019 (0.931, 1.115)        | 0.0024 (-0.001, 0.006)          |
| Asian                                                                                  | <b>0.850 (0.759, 0.951)</b> | <b>-0.0238 (-0.039, -0.009)</b> |
| Black or African American                                                              | <b>0.949 (0.926, 0.972)</b> | -0.004 (-0.021, 0.013)          |
| Native Hawaiian or Other Pacific Islander                                              | 1.070 (0.963, 1.190)        | <b>0.0093 (0.005, 0.014)</b>    |
| Mixed                                                                                  | 1.020 (0.938, 1.108)        | 0.0018 (-0.005, 0.009)          |
| Not Latino (ref=Latino)                                                                | <b>1.113 (1.067, 1.162)</b> | <b>0.0105 (0.007, 0.014)</b>    |
| Marital status (ref=Never Married)                                                     |                             |                                 |
| Married                                                                                | 0.981 (0.955, 1.008)        | -0.0019 (-0.018, 0.014)         |
| Previously Married                                                                     | 1.013 (0.990, 1.036)        | 0.0023 (-0.002, 0.007)          |
| Not Homeless (ref=Homeless)                                                            | <b>1.175 (1.152, 1.199)</b> | <b>0.0191 (0.016, 0.022)</b>    |
| <b>Access to Healthcare Systems</b>                                                    |                             |                                 |
| Distance to VA Specialty Care No (<= 40 miles) (ref = Yes (>40 miles))                 | <b>0.810 (0.785, 0.837)</b> | <b>-0.0536 (-0.055, -0.053)</b> |
| Rurality (ref=Urban)                                                                   |                             |                                 |
| Rural                                                                                  | <b>0.888 (0.855, 0.923)</b> | <b>-0.0298 (-0.03, -0.029)</b>  |
| Highly rural                                                                           | <b>0.790 (0.683, 0.913)</b> | <b>-0.0606 (-0.062, -0.059)</b> |
| VA priority group assignment High priority service (ref=Above annual income threshold) | <b>1.123 (1.072, 1.177)</b> | <b>0.0136 (0.010, 0.018)</b>    |
| Health insurance (ref=no health insurance)                                             | <b>0.666 (0.652, 0.681)</b> | <b>-0.0459 (-0.067, -0.025)</b> |
| <b>County Characteristics</b>                                                          |                             |                                 |
| VA Medical Center (ref=no VAMC)                                                        | <b>1.525 (1.388, 1.675)</b> | 0.0534 (-0.002, 0.109)          |
| Ratio of population to behavioral health providers                                     | 0.994 (0.984, 1.004)        | -0.0019 (-0.023, 0.019)         |
| Median income                                                                          | 1.002 (0.998, 1.006)        | -0.0004 (-0.030, 0.030)         |



|                          |                             |                                |
|--------------------------|-----------------------------|--------------------------------|
| Unemployment rate        | <b>0.947 (0.928, 0.967)</b> | -0.0034 (-0.060, 0.054)        |
| Poverty rate             | 1.007 (0.998, 1.016)        | -0.0012 (-0.038, 0.036)        |
| Fiscal Year (ref=FY2016) |                             |                                |
| 2017                     | 1.011 (0.983, 1.039)        | 0.0019 (-0.040, 0.0440)        |
| 2018                     | 1.016 (0.983, 1.050)        | 0.0046 (-0.006, 0.015)         |
| 2019                     | <b>0.836 (0.807, 0.866)</b> | <b>-0.018 (-0.032, -0.004)</b> |
| <b>Intercept</b>         | N/A                         | -0.079 (-0.107, -0.050)        |

Note: Text is bolded when  $p < .05$ .
